1  
2  
3  
4  
5  
6  
7  
8  
9  
10  
11  
12  
13  
14  
15  
16  
17  
18  
19  
20  
21  
22  
23  
24  
25  
26  
27  
28  
29  
30

Effects of seasonality, fertilization and species on the chlorophyll *a* fluorescence as related with  
photosynthesis and leguminous tree growth during Amazonian forest restoration

Roberto Kirmayr Jaquetti<sup>1\*</sup>, José Francisco de Carvalho Gonçalves<sup>1</sup>, Henrique Eduardo  
Mendonça Nascimento<sup>1</sup>, Karen Cristina Pires da Costa<sup>2</sup>, Jair Max Fortunato Maia<sup>3</sup>, Flávia  
Camila Schimpl<sup>4</sup>

<sup>1</sup>National Institute for Amazonian Research, Laboratory of Plant Physiology and Biochemistry,  
Manaus, Amazonas, Brazil.

<sup>2</sup>Federal University of South and Southeast of Pará, Faculty of Agronomy, Institute of Studies  
in Agrarian and Regional Development, Marabá, Para, Brazil.

<sup>3</sup>University of Amazonas State, Biological Science Program, Manaus, Amazonas, Brazil.

<sup>4</sup>Federal Amazonian Institute, Presidente Figueiredo, Amazonas, Brazil

\*Corresponding author

E-mail: [jaquettiroberto@gmail.com](mailto:jaquettiroberto@gmail.com) (RKJ)

## 1 **Abstract**

2 The ability of species to adjust their light energy uptake is determined during plant  
3 establishment and development. Changes in resource availability may impact energy fluxes and  
4 photosynthesis. General and specific variations in chlorophyll *a* fluorescence under high vs. low  
5 water and nutrient conditions have been studied. N<sub>2</sub>-fixing leguminous trees, which are  
6 commonly used in tropical forest restoration, seem to be very well adapted to degraded  
7 ecosystems. To understand the effects of biological nitrogen fixation on Chl *a* fluorescence  
8 variables, three of the six Fabaceae species selected for this study were N<sub>2</sub>-fixing species.  
9 Additionally, the correlation among Chl *a* fluorescence and growth, photosynthesis and nutrient  
10 levels was evaluated. A 24-month forest restoration experiment was established, and data on  
11 dark-adapted Chl *a* fluorescence, photosynthesis, diameter growth and foliar nutrients were  
12 collected. Multivariate analysis was performed to detect the effects of seasonality and  
13 fertilization. Under high water- and nutrient-availability conditions, plants exhibited enhanced  
14 performance index values that were correlated with electron transport fluxes. Under drought and  
15 nutrient-poor conditions, most species exhibited increased energy dissipation as a method of  
16 photoprotection. Great interspecific variation was found; therefore, species-specific responses to  
17 the test conditions should be considered in future studies. N<sub>2</sub>-fixing species showed increased  
18 performance index and maximum fluorescence values, indicating their ability to colonize high-  
19 light environments. Negative correlations were found between photosynthesis and trapped  
20 fluxes and between diameter growth and initial fluorescence. Electron transport fluxes were  
21 positively correlated with growth. Given the different responses identified among species, Chl *a*  
22 fluorescence is considered a cost-effective technique to screen for seasonality, nutrient and N<sub>2</sub>-  
23 fixing species effects and should be considered for use during forest restoration. Finally,  
24 including N<sub>2</sub>-fixing species and multiple fertilization treatments in related studies may greatly  
25 facilitate the restoration of biogeochemical cycles in the tropics.

26

## 27 **Introduction**

28 Plant species use light from the sun as their primary source of energy for  
29 photosynthesis. The excessive light energy in degraded tropical forest ecosystems (above 3000  
30  $\mu\text{mol m}^{-2} \text{s}^{-1}$ ) may cause photoinhibition in poorly adapted species, affecting their  
31 photosynthesis and growth (1,2). Some species may exhibit enhanced light uptake and plastic  
32 responses under high-light environments, and these species are considered fundamental for the

33 establishment of forest restoration vegetation (3,4). N<sub>2</sub>-fixing tree species may enhance light  
34 uptake, particularly in nutrient-limited soils (5,6).

35 Dark-adapted chlorophyll *a* fluorescence (ChF) measurements based on dissipative  
36 (*DI*), absorbed (*ABS*), trapped (*TR*) and transport (*ET*) energy fluxes are considered effective  
37 indicators of the effects of stress on photosynthetic performance (7,8). The OJIP curve (shape)  
38 has also been applied in the early detection of different abiotic stresses (9). Various effects on  
39 the quantum yield of PSII photochemistry ( $F_V/F_M$ ) and the performance index have been  
40 reported under drought depending on the water deficit severity and on the tested species (10).

41 As drought progresses, plants may downregulate electron transport and increase  
42 dissipation fluxes through the inactivation of PSII *RCs* (11,12). Degraded areas with multiple  
43 nutrient deficiencies and decreased soil organic matter in the Amazon Basin can influence plant  
44 photochemical activities, thus restricting photosynthesis and plant growth (13,14). Increased  
45 drought resistance after fertilization has been reported to be due to the enhanced quantum yield  
46 and photosynthesis (15,16). Studies on tropical environments have demonstrated the synergistic  
47 effects of multiple-nutrient fertilization on biomass growth during forest restoration with  
48 leguminous trees (17,18). However, only a few studies have evaluated the effects of combined  
49 drought and nutrient stresses on growth and photosynthetic performance.

50 There has been increased interest in ChF responses to environmental cues and their  
51 correlation to photosynthesis and growth traits (19–21). ChF has been demonstrated to be an  
52 effective technique to detect different environmental cues, although the large number of  
53 variables based on *ABS*, reaction centers (*RCs*) and cross-sections (*CSs*) may confuse  
54 researchers (22). Multivariate analyses such as principal component analyses (PCAs) may  
55 reduce the noise associated with large ChF datasets, allowing researchers to understand how  
56 different species and ecological groups adjust energy fluxes (23). Likewise, in addition to being  
57 less expensive than photosynthesis measurements, ChF can also detect effects such as  
58 seasonality, which are harder to notice during growth analysis under field conditions.

59 Understanding ChF responses in ecological restoration species may increase forest  
60 restoration success. While a substantial number of ChF studies exist, some knowledge gaps still

61 remain. For instance, no ecophysiological studies on important *Clitoria* or *Cenostigma* species  
62 have been published. Studies of the effects of drought on ChF traits in tropical leguminous trees  
63 are also lacking. Moreover, few studies have demonstrated the correlations between ChF  
64 variables and growth, photosynthesis and nutrient traits. Therefore, three main hypotheses were  
65 tested: 1. Leguminous trees adjust their photochemical energy fluxes under different water and  
66 nutrient availability conditions; 2. Evolutionary N<sub>2</sub>-fixing species will exhibit enhanced  
67 transport fluxes and plant performance regardless of nutritional status; and 3. ChF variables are  
68 correlated with growth, photosynthesis and nutrient traits.

## 69 **Materials and methods**

### 70 **Experimental trial, species and treatments**

71 Substantial variability in precipitation, temperature and soil properties can be found  
72 across Amazonian ecosystems. Central Amazonia is characterized by low natural soil fertility  
73 and high irradiance, temperatures, and monthly precipitation. Without delving into a  
74 geopolitical and scientific discussion, large- and small-scale degradation is widespread  
75 throughout the basin. The experimental trial was established in a typical homogeneous area of  
76 the Forest Restoration Program of the Balbina Hydropower Dam in Amazonas state, Brazil.  
77 Located two hours by car from Manaus, the 3 ha area was degraded and abandoned 30 years  
78 ago by the complete removal without burning of the nonflooded and dense *terra firme* forest.  
79 The area is surrounded by a natural nonflooded and dense *terra firme* forest. Despite  
80 maintaining its good physical characteristics of the soil, nutrient deficiencies for nitrogen (N)  
81 (0.16 g kg<sup>-1</sup>), phosphorus (P) (0.14 mg dm<sup>-3</sup>), calcium (Ca) and magnesium (Mg) (0.3 cmol<sub>c</sub> dm<sup>-3</sup>)  
82 <sup>3</sup>), were found. Natural regeneration was not observed before intervention supporting the  
83 planting seedlings choice. Nine blocks (n = 9) measuring 6 m x 72 m (432 m<sup>2</sup> area) each were  
84 placed across the area containing all 12 treatments in a combination of six tree legumes species  
85 under low- (unfertilized) and high-nutrient (fertilized) treatments (Fig 1). The 108 studied plants  
86 were selected from a total of 432 individuals planted. The high-nutrient treatment received four

87 applications of macro- and micronutrients in the beginning of dry and wet season, while the  
88 low-nutrient treatment received no fertilization throughout the 24-month experiment.

89

90 **Fig 1. Graphical depiction with the location of the “Alalau” degraded area, the**  
91 **experimental design, and the apparent conditions before intervention and 2 years after the**  
92 **tropical forest restoration.** Experimental design with 12 treatments (fertilization x species)  
93 randomly allocated in nine blocks (n = 9). Lost parcels (n) due to the mortality of four replicates  
94 are represented by the crossed squares (⊠). T1 and T7, *C. tocaninum*; T2 and T8, *S. reticulata*;  
95 T3 and T9, *D. odorata*, T4 and T10, *C. fairchildiana*; T5 and T11, *I. edulis*; T6 and T12, *Acacia*  
96 sp.; T1 to T6, low-nutrient treatments; and T7 to T12, high-nutrient. For example, the four  
97 replicates of T3 treatment (low-nutrient x *D. odorata*) on block eight, are defined with the cross  
98 symbol (+) in the enlarged parcel, and the circulate-cross (⊕) illustrate the selected plant for  
99 data sampling. The map was accomplished with scribblemaps.com free version.

100

101 Under normal conditions precipitation around the area is well distributed with less rainy  
102 months (around 150 mm month<sup>-1</sup>) from June to November. During the experimental course the  
103 strong 2015/16 El Niño-Southern Oscillation (ENSO) event caused a 60-day period with no  
104 precipitation when first measurements were performed (dry season). Second measurements  
105 were accomplished 6 months later (rainy season), after recovery. The inclusion of inoculated  
106 N<sub>2</sub>-fixing species was expected to improve resource use efficiency by lowering the necessary  
107 external inputs and the time required to rebuild C stocks (24). The six species selected from  
108 Fabaceae for planting were three non-N<sub>2</sub>-fixing: *Cenostigma tocaninum* Ducke, *Senna*  
109 *reticulata* (Willd.) H.S. Irwin & Barneby, *Dipteryx odorata* (Aubl.) Willd.; and three N<sub>2</sub>-fixing:  
110 *Clitoria fairchildiana* R.A. Howard., *Inga edulis* Mart.—and one alien *Acacia* sp. The alien  
111 *Acacia* sp. is frequently planted as capable of growing even in highly degraded areas.

112 The relative growth rate of the diameter (RGR<sub>D</sub>) of each tree, hereafter the diameter  
113 growth, was calculated 24 months after plantating (17). Detailed information on the species

114 used, fertilization methods, experimental trials and monthly precipitation during the  
115 experimental period can be found in (25).

## 116 **Photosynthesis measurements**

117 Photosynthesis was measured between 8:00 and 11:30 h in nine selected plants per  
118 treatment in the dry and wet seasons. Healthy, sun-exposed and completely expanded leaves on  
119 the east side of the plants were selected from the middle third of each plant. The net  
120 photosynthetic rate ( $P_n$ ), hereafter referred to as photosynthesis, was measured using a portable  
121 photosynthesis system (Li-6400, Li-Cor Inc., Lincoln, NE, USA) as described by (26). Each  
122 measurement was performed at photosynthetic photon flux densities of 0 and 2000  $\mu\text{mol m}^{-2} \text{s}^{-1}$   
123 with the foliar chamber adjusted to a  $\text{CO}_2$  concentration, temperature and water vapor  
124 concentration of  $400 \pm 4 \mu\text{mol mol}^{-1}$ ,  $31 \text{ }^\circ\text{C} \pm 1 \text{ }^\circ\text{C}$  and  $21 \pm 1 \text{ mmol mol}^{-1}$ , respectively.

## 125 **Chlorophyll *a* fluorescence**

126 The dark-adapted ChF measurements were performed with a portable fluorometer (Handy  
127 PEA, MK2-9600-Hansatech, Norfolk, UK) on the same individuals and leaves used for the  
128 photosynthesis measurements between 8:30 and 11:00 h. The selected leaves were dark-adapted  
129 for a period of 30 min and then exposed to a 1 s excitation pulse of intensely saturating light  
130 ( $3000 \mu\text{mol m}^{-2} \text{s}^{-1}$ ) at a wavelength of 650 nm. Fast fluorescence transients were calculated  
131 based on the so-called “JIP-test” (27). The performance index on an absorption basis ( $PI_{\text{ABS}}$ ),  
132 hereafter the performance index, which combines  $DI$ ,  $TR$  and  $ET$  fluxes, was calculated as  
133 described by (28). The units and formulae used are provided in Table S2.

## 134 **Foliar nutrient concentration**

135 The macro- and micronutrient concentrations of the leaves were determined in each  
136 treatment after the leaf samples were oven-dried at  $65 \text{ }^\circ\text{C}$  and ground. The N concentration  
137 (mass basis) was determined with a 2400 Series II CHNS/O Organic Elemental Analyzer  
138 (PerkinElmer Inc., Waltham, MA, USA). The P concentration was determined by

139 spectrophotometry at 725 nm. The potassium (K), Ca and Mg, iron (Fe) and zinc (Zn)  
140 concentrations were determined using atomic absorption spectrophotometry (PerkinElmer  
141 1100B, Inc., Waltham, MA, USA) according to Jaqueti et al. (17).

## 142 **Data analysis**

143 A complete randomized block experimental design was used. The interrelationships  
144 among ChF variables were assessed using the PCA ordination method, which reduces the  
145 dimensionality of the original data (29). PCA was performed to evaluate the effects of the  
146 seasonality and fertilization treatments. All variables were standardized by the maximum  
147 relatedness (30) prior to analysis. Product-moment correlations were used to assess the  
148 influences of seasonality (dry and wet seasons) and fertilization (fertilized and unfertilized  
149 treatments) on the ordination axes and each original variable. At a probability level of  $P < 0.05$ ,  
150 pairwise t-tests were performed to evaluate the significance of the seasonality and fertilization  
151 effects. The analyses were run initially with 21 ChF variables and were run again with the 11  
152 most responsive after removing similar and nonresponsive variables (S1 Table). The effects of  
153 seasonality and fertilization on the performance index and the energy dissipation flux per active  
154 PSII ( $DI_0/RC$ ), hereafter the energy dissipation, were compared using repeated measure two-  
155 way ANOVA with seasonality (dry and wet) as the repeated measure and species and  
156 fertilization treatments as factors. The relationships among ChF variables and functional traits  
157 were tested using nonparametric Spearman pairwise correlation analysis in the fertilized plants  
158 and during the wet season. The PCA was performed with PAST-UiO 3.0 (Hammer and Harper,  
159 Oslo, NO), and the inferential tests were performed with STATISTICA 12.0 (TIBCO Software  
160 Inc., CA, USA).

161

## 162 **Results**

### 163 **Seasonal effects in the high- and low-nutrient treatments**

164 Corroborating the first hypothesis, plants in the high-nutrient treatment adjust energy  
165 fluxes to seasonality. Significant differences separating dry and wet seasons were found in  
166 PCA axis 1 ( $t = -3.12, p < 0.01$ ) (S1 Table). Most individuals enhanced energy dissipation  
167 fluxes and apparent antenna size of an active PSII ( $ABS/RC$ ), hereafter antenna size, in the dry  
168 season (see S2 Table for the product-moment correlations). Enhanced efficiency of electron  
169 transport after  $Q_A^-$  ( $ET_0/TR_0$ ), hereafter electron transport, and performance index were found in  
170 the wet season (Fig 2). Low-nutrient plants adjust poorly to seasonal effects with no clear  
171 separation between dry and wet seasons. Slight differences were found in PCA axis 1 ( $t = -2.05,$   
172  $p < 0.05$ ) (S1 Table and S1 Fig), suggesting that multiple nutrient deficiencies weakened the  
173 leguminous trees ChF adjustments to seasonal effects.

174

175 **Fig 2. PCA ordination and loadings graphic of seasonal effects in the high-nutrient**  
176 **treatment.**  $PI_{ABS}$ , performance index;  $ET_0/TR_0$ , efficiency of electron transport;  $DI_0/RC$ , energy  
177 dissipation flux;  $ABS/RC$ , antenna size of an active PSII  $RC$ ;  $F_M$ , maximum fluorescence;  $F_V$ ,  
178 maximum variable fluorescence.

179

## 180 **Fertilization effects during dry and wet seasons**

181 Most plants adjust energy fluxes to different nutrient regimes during the wet season. An  
182 evident separation between high- and low-nutrient treatments was found in PCA axis 1 ( $t = -$   
183  $3.14, p < 0.01$ ) (S1 Table). Plants in the high-nutrient treatment exhibited higher performance  
184 index values and greater electron transport, while low-nutrient plants exhibited increased energy  
185 dissipation and initial Chl  $a$  fluorescence ( $F_0$ ), hereafter the initial fluorescence (Fig 3). In the  
186 dry season, a noticeable effect for the fertilization treatment was found in PCA axis 1 ( $t = -3.61,$   
187  $p < 0.001$ ). Low-nutrient plants contribute to increased energy dissipation fluxes, while high-  
188 nutrient plants improved electron transport and the electron transport flux per active PSII  
189 ( $ET_0/RC$ ) (S2 Fig). These findings suggest that the drought resistance of leguminous trees  
190 increased under the fertilization treatments. Low-nutrient *Acacia* sp. adjusts ChF variables



191 differently with high electron transport and performance index values independent of seasonal  
192 effects (S3 Table).

193

194 **Fig 3. PCA ordination and loadings graphic of fertilization effects during the wet season.**

195  $PI_{ABS}$ , performance index on an absorption basis;  $ET_0/TR_0$ , efficiency of electron transport;

196  $DI_0/RC$ , energy dissipation flux;  $ABS/RC$ , antenna size of an active PSII RC;  $F_M$ , maximum

197 fluorescence;  $F_v$ , maximum variable fluorescence.

198

199 **Seasonal, fertilization and specific effects on  $PI_{ABS}$  and  $DI_0/RC$**

200 Considering the performance index significant effects were found for the fertilization and  
201 species treatments with a significant interaction between factors. For the repeated measures

202 differences were found between dry and wet seasons with the interaction between species and

203 seasonal effects. No interaction was found between seasonal and fertilization effects (S4 Table).

204 When species were compared significant differences were found between N<sub>2</sub>-fixing and non-N<sub>2</sub>-  
205 fixing species with highest performance values for *Acacia* sp. and *I. edulis* (Fig 4).

206

207 **Fig 4. Performance index values under low vs. high water and nutrient availability (Mean**  
208 **± SD).**

209

210 Considering the energy dissipation significant differences were found for both

211 fertilization and species treatments with interaction between factors. For the seasonal effects

212 statistical differences were found among dry and wet seasons with no interactions among

213 factors. Comparing the species, the late-successional *D. odorata* increased energy dissipation,

214 while no differences were found among other species (Fig 5).

215

216 **Fig 5. Energy dissipation flux values under low vs. high water and nutrient availability**  
217 **(Mean ± SD).**

218

219 **Correlation of ChF with photosynthesis, foliar nutrient and**  
 220 **plant growth**

221 Under high water and nutrient availability, performance index was positively correlated  
 222 with diameter growth ( $r_s = 0.65$ ) and Zn ( $r_s = 0.52$ ). Maximum trapped exciton flux of an active  
 223 PSII ( $TR_0/RC$ ), hereafter the trapped flux, was negatively correlated with photosynthesis ( $r_s = -$   
 224  $0.66$ ), N ( $r_s = -0.58$ ) and Zn ( $r_s = -0.53$ ). Negative correlations with moderate collinearity were  
 225 found between diameter growth and  $F_0$  ( $r_s = -0.61$ ) and energy dissipation ( $r_s = -0.57$ ) (Table 1).  
 226 Electron transport was positively correlated with Zn ( $r_s = 0.51$ ) and growth ( $r_s = 0.63$ ) and  
 227 negatively correlated with Ca ( $r_s = -0.58$ ).

228

229 **Table 1: Pairwise Spearman correlation coefficients ( $r_s$ ) among ChF variables and growth,**  
 230 **photosynthesis and foliar nutrient concentrations.**

|                                      | <b>RGR<sub>D</sub></b> | <b>P<sub>n</sub></b> | <b>N</b>           | <b>P</b>            | <b>K</b>            | <b>Ca</b>          | <b>Mg</b>           | <b>Fe</b>           | <b>Zn</b>           |
|--------------------------------------|------------------------|----------------------|--------------------|---------------------|---------------------|--------------------|---------------------|---------------------|---------------------|
| <b>F<sub>0</sub></b>                 | <b>-0.61**</b>         | -0.35**              | -0.28*             | 0.00 <sup>ns</sup>  | 0.21 <sup>ns</sup>  | 0.11 <sup>ns</sup> | -0.14 <sup>ns</sup> | -0.28*              | -0.26 <sup>ns</sup> |
| <b>F<sub>M</sub></b>                 | 0.31 <sup>ns</sup>     | -0.05 <sup>ns</sup>  | 0.08 <sup>ns</sup> | 0.34*               | -0.25 <sup>ns</sup> | 0.41**             | 0.02 <sup>ns</sup>  | -0.19 <sup>ns</sup> | -0.09 <sup>ns</sup> |
| <b>F<sub>V</sub></b>                 | -0.13 <sup>ns</sup>    | 0.05 <sup>ns</sup>   | 0.18 <sup>ns</sup> | 0.33*               | -0.30*              | 0.37**             | 0.08 <sup>ns</sup>  | -0.10 <sup>ns</sup> | 0.01 <sup>ns</sup>  |
| <b>F<sub>V</sub>/F<sub>M</sub></b>   | <b>0.51**</b>          | 0.29 <sup>ns</sup>   | 0.28*              | 0.08 <sup>ns</sup>  | -0.27 <sup>ns</sup> | 0.03 <sup>ns</sup> | 0.11 <sup>ns</sup>  | 0.24 <sup>ns</sup>  | 0.22 <sup>ns</sup>  |
| <b>PI<sub>ABS</sub></b>              | <b>0.65**</b>          | 0.40*                | 0.49**             | -0.21 <sup>ns</sup> | -0.17 <sup>ns</sup> | -0.40**            | -0.02 <sup>ns</sup> | 0.37**              | <b>0.52**</b>       |
| <b>ET<sub>0</sub>/TR<sub>0</sub></b> | <b>0.63**</b>          | 0.38*                | 0.46**             | -0.32*              | -0.17 <sup>ns</sup> | <b>-0.50**</b>     | -0.08 <sup>ns</sup> | 0.33*               | <b>0.51**</b>       |
| <b>TR<sub>0</sub>/RC</b>             | -0.44**                | <b>-0.66**</b>       | <b>-0.58**</b>     | -0.03 <sup>ns</sup> | 0.09 <sup>ns</sup>  | -0.41**            | 0.08 <sup>ns</sup>  | -0.26 <sup>ns</sup> | <b>-0.53**</b>      |
| <b>DI<sub>0</sub>/RC</b>             | <b>-0.57**</b>         | -0.44**              | -0.42**            | -0.04 <sup>ns</sup> | 0.23 <sup>ns</sup>  | 0.11 <sup>ns</sup> | -0.08 <sup>ns</sup> | -0.26 <sup>ns</sup> | -0.35*              |

231  $F_0$ , initial fluorescence;  $F_M$ , maximum fluorescence;  $F_V$ , maximum variable fluorescence;  
 232  $F_V/F_M$ , maximum quantum yield of PSII photochemistry;  $PI_{ABS}$ , performance index on an  
 233 absorption basis;  $ET_0/TR_0$ , efficiency of electron transport;  $TR_0/RC$ , maximum trapped exciton  
 234 flux;  $DI_0/RC$ , energy dissipation flux; RGR<sub>D</sub>, relative growth rate in diameter;  $P_n$ , net  
 235 photosynthetic rate; N, nitrogen, P, phosphorous, K, potassium, Ca, calcium, Mg, magnesium,  
 236 Fe, iron, and Zn, zinc concentrations in leaves.

237 Bold values are highly significant ( $p < 0.001$ ) with high ( $r_s > 0.70$ ) and moderate ( $0.50 < r_s <$   
 238  $0.70$ ) collinearity between variables. \* Significance at the 0.05 level; \*\* Significance at the 0.01  
 239 level.

240

## 241 **Discussion**

### 242 **Ecofunctional aspects of seasonal and nutrient effects on ChF**

243 As general stress responses plants exposed to drought and nutrient deficiencies in this  
244 study exhibited enhanced energy dissipation, antenna size and initial fluorescence conformingly  
245 as energy may be lost from plants through fluorescence emissions and heat dissipation (31).

246 With high water and nutrient availability, plant energy is mainly directed to photochemistry (32)  
247 and electron transport in plants increases, thus improving plant performance (Fig 6).

248

249 **Fig 6: ChF adjustments in antenna size, energy dissipation and electron transport.**

250 *ABS/RC*, antenna size of an active PSII reaction center. The dark green means increased and  
251 light green decreased values of, dark red represent increased quantum yield and electron  
252 transport flux. Dark green and red indicates increased values of PSII antenna size and electron  
253 transport flux, and light green and red indicates decreased values.

254

255 Usually, degraded environments expose plants to excessive light energy, and early-  
256 successional species are thought to be less photoinhibited than late-successional species (33,34).

257 Correspondingly, energy dissipation increased in the late-successional *D. odorata*, indicating  
258 photoinhibition and oxidative stress (35). Nonetheless, the late-successional *C. tocaninum*  
259 appeared to be better adapted to high-light conditions when it was fertilized. Under high-light  
260 environments, adapted species such as the N<sub>2</sub>-fixing *C. fairchildiana*, *I. edulis* and *Acacia* sp.  
261 enhance their electron transport, increasing their sink strength and light use efficiency (36). The  
262 novel finding of the positive correlation between growth and electron transport may have  
263 important applications in developing genetic improvements that will result in higher individual  
264 plant performance.

265 Extreme climatic events such as the ENSO may cause drought periods in previously  
266 unaffected regions of the Amazon Basin (37). Under moderate drought conditions,  
267 photosynthesis may be downregulated, which restricts CO<sub>2</sub> availability, thus affecting  
268 photochemistry and electron transport (38,39). Corroborating the present findings through  
269 metabolic adjustments, drought-resistant *Acacia* species can maintain cell membrane integrity  
270 and electron transport longer than other species as the water deficit increases (40,41). The  
271 increased drought tolerance under fertilization found in three species in the present study may  
272 be related to the increased PSII RC aperture, electron transport efficiency and photoinhibition  
273 relief (42).

274 Plants may respond to fertilization treatments with increased plant performance and  
275 photosynthesis due to the increased nutrient availability in the soil (6,43). The decreased  
276 performance index under drought and nutrient deficiencies suggests increased photoinhibition  
277 and reduced electron transport, which negatively affect photosynthesis and growth (42).

278 The present study demonstrates the negative correlations between trapped energy flux  
279 and photosynthesis and between initial fluorescence and growth. Both of these findings have  
280 important potential ecological and silvicultural applications in the selection of well-adapted  
281 species for degraded environments. In addition to the present results, positive correlations were  
282 found among photosynthesis, quantum yield and variable fluorescence in *Populus* and  
283 *Miscanthus* species (44,45). Positive correlations were previously found among Fe, the  
284 performance index and electron transport (46) and between electron transport and  
285 photosynthesis (47,48). In contrast, no correlation was observed between photosynthesis and  
286 ChF variables in barley plants under drought and control treatments (12).

## 287 **Performance variables, $PI_{ABS}$ and $ET_0/TR_0$**

288 The  $PI_{ABS}$ , which incorporates the density of PSII RCs, electron transport beyond  $Q_A$ , and  
289 trapped fluxes, is widely used to study photosynthesis and the functionality of PSII and PSI  
290 under stress (1,10). The increased performance index values found under high resource  
291 availability and in N<sub>2</sub>-fixing species may result from changes in the PSII antenna size, trapping

292 efficiency and electron transport (8,27). Here, multivariate analysis demonstrated a positive  
293 correlation between plant performance and electron transport adjustments. Corroborating  
294 previous findings, the performance index was a more sensitive variable for evaluating  
295 fertilization and drought effects than the PSII quantum yield (28,49).

296         The electron transport fluxes variables reflect the maximum electron transport between  
297 PSII and PSI and indicate changes in photosynthetic apparatus activity (50). The increased  
298 electron transport found in the well-adapted and highly productive *Acacia* sp. species may  
299 reflect improved recovery on the PSII acceptor side. The diminished electron transport reported  
300 under nutrient-poor conditions may be partially due to the overreduction of the PSII acceptor  
301 side (51).

### 302 **Stress variables, $DI_0/RC$ , $ABS/RC$ and $F_0$**

303         Under the stressful, high-light conditions found in degraded areas, trees may increase  
304 their protective quenching activity to dissipate excessive absorbed energy. The increased  
305 dissipation fluxes that occur due to the inactivation of RCs may work as strong quenchers to  
306 reduce photooxidative damage (28,53). Moreover, the increased energy dissipation indicates the  
307 inefficient reoxidation of the reduced  $Q_A^-$  and electron transport to quinone  $Q_B$  (8,54).  
308 Corroborating previous studies, the positive correlation between energy dissipation and the  
309 initial fluorescence of stressed individuals may be associated with increased antenna size and  
310 PSII RC inactivation (11).

311         The negative correlation between dissipative energy and  $P_n$  suggests decreased electron  
312 transport and photochemical yield. Increased energy dissipation and antenna size have been  
313 previously reported as early indicators of the effects of high light, drought, and nutrient  
314 deficiency (9,54). Both positive and negligible effects of drought on PSII quantum yield have  
315 been previously reported; the effect depends on the nutrient status of individual plants (55,56).  
316 Our results indicate negligible interactions of seasonality and fertilization treatments effects.  
317 Moreover, in species of the *Acacia* genus, increasing water deficit has negligible effects on  
318 quantum yield, which is related to the increased protective carotenoid content (57).

## 319 **OJIP transient test**

320 The OJIP transient curve is used for the early detection of drought and nutrient stress  
321 (58). Multiple nutrient deficiencies reduce the slope of the OJIP curves in most species due to  
322 reduced ATP production under K and P deficiencies (9,58). The reduced O-J rise found in *S.*  
323 *reticulata* and *C. tocaninum* reflected the impaired electron transport from pheophytin and  
324 beyond  $Q_A$  (59). The stress responses of *S. reticulata* and *D. odorata* (S3 Fig) resulted in a  
325 reduced amplitude of the thermal phase (I-P rise) due to the accumulation of reduced  $Q_A^-$  and  
326 the decreased activity of PSII (11,32).

327 The sharp decrease in the maximum Chl *a* fluorescence ( $F_M$ ) and the increase in initial  
328 fluorescence values observed in *D. odorata* under high light suggest the inactivation of RCs and  
329 the inhibition of electron transport beyond  $Q_A$  (60). The enhanced photochemical efficiency and  
330 productivity in *Acacia* sp. were due to the increased  $F_M$  values and the absence of the P step (S3  
331 Fig). The increased I-P rise in the well-adapted and highly productive *Acacia* sp. may be related  
332 to the enhanced rate of ferredoxin reduction and electron transport between PQ and PSI (36).  
333

## 334 **Conclusions**

335 The ChF technique is valuable for understanding the photochemical phase of  
336 photosynthesis and how it affects other functional traits. Nevertheless, ChF has rarely been used  
337 to assess the photosynthetic performance and adaptation ability of species used in forest  
338 restoration. As evidenced in the present study, adjustments in energy fluxes during light uptake  
339 are determinants of the growth and establishment of different species. Additionally, plants can  
340 increase energy dissipation when resources are scarce and enhance electron transport when  
341 resources are abundant.  $N_2$ -fixing species with enhanced performance appear to be highly  
342 adapted to degraded, high-light environments. In particular, the increased electron transport  
343 fluxes in *Acacia* sp. may explain the enhanced sink strength and growth of these species in  
344 locations with multiple resource limitations. Future studies on the functional aspects of

345 leguminous trees are recommended, especially studies on N<sub>2</sub>-fixing species that may facilitate  
346 the restoration of important biogeochemical cycles.

347

348

## 349 **Acknowledgments**

350 The authors are grateful to the Balbina Hydroelectric Dam for enabling the collection of  
351 experimental data and to the Coordination for the Improvement of Higher Education Personnel  
352 (Coordenação de Aperfeiçoamento de Pessoal de Nível Superior – CAPES) and the National  
353 Council for Scientific and Technological Development (Conselho Nacional de  
354 Desenvolvimento Científico e Tecnológico – CNPq) for financial support. J.F.C. Gonçalves is a  
355 researcher with the Brazilian Council for Research and Development (CNPq).

356

357

## 358 **References**

- 359 1. Gonçalves JFC, dos Santos Junior UM. Utilization of the chlorophyll *a* fluorescence as a  
360 tool for selecting tolerant species to environments of high irradiance. *Braz J Plant*  
361 *Physiol.* 2005;17:307-313. <https://doi.org/10.1590/S1677-04202005000300005>
- 362 2. Gonçalves JFC, Silva CE, Guimarães DG, Bernardes RS. Análise dos transientes da  
363 fluorescência da clorofila *a* de plantas jovens de *Carapa guianensis* e de *Dipteryx*  
364 *odorata* submetidas a dois ambientes de luz. *Acta Amazon.* 2010;40(1):89-98.  
365 Portuguese. <https://www.scielo.br/pdf/aa/v40n1/v40n1a12>
- 366 3. Barros FV, Goulart MF, Sá Telles SB, Lovato MB, Valladares F, de Lemos-Filho JP.  
367 Phenotypic plasticity to light of two congeneric trees from contrasting habitats: Brazilian  
368 Atlantic Forest *versus* cerrado (savanna). *Plant Biol.* 2012;14(1):208-15.  
369 <https://doi.org/10.1111/j.1438-8677.2011.00474.x>
- 370 4. Niinemets Ü, Valladares F. Photosynthetic acclimation to simultaneous and interacting

- 371 environmental stresses along natural light gradients: Optimality and constraints. *Plant*  
372 *Biol.* 2004;6:254-68. <https://doi.org/10.1055/s-2004-817881>
- 373 5. Adams MA, Turnbull TL, Sprent JI, Buchmann N. Legumes are different: Leaf nitrogen,  
374 photosynthesis, and water use efficiency. *Proc Natl Acad Sci.* 2016;113(15):4098-103.  
375 <https://doi.org/10.1073/pnas.1523936113>
- 376 6. Jaquetti RK, Gonçalves JFC, Ferraz JBS, Ferreira MJ, dos Santos Junior UM, Lacerda  
377 CF. Green fertilization enhances the photosynthetic performance and the growth of  
378 leguminous trees for restoration plantation in Central Amazon. *Am J Plant Sci.*  
379 2014;5:2497-508. Available from: <http://dx.doi.org/10.4236/ajps.2014.516264>
- 380 7. Force L, Critchley C, van Rensen JJS. New fluorescence parameters for monitoring  
381 photosynthesis in plants. *Photosynth Res.* 2003;78:17-33.  
382 <https://doi.org/10.1023/A:1026012116709>
- 383 8. Kalaji HM, Schansker G, Ladle RJ, Goltsev V, Bosa K, Allakhverdiev SI, et al.  
384 Frequently asked questions about in vivo chlorophyll fluorescence: Practical issues.  
385 *Photosynth Res.* 2014;122:121-58. <https://doi.org/10.1007/s11120-014-0024-6>
- 386 9. Kalaji HM, Rastogi A, Živčák M, Brestic M, Daszkowska-Golec A, Sitko K, et al.  
387 Prompt chlorophyll fluorescence as a tool for crop phenotyping: an example of barley  
388 landraces exposed to various abiotic stress factors. *Photosynthetica.* 2018;56:953-961.  
389 Available from: <https://doi.org/10.1007/s11099-018-0766-z>
- 390 10. Banks JM. Chlorophyll fluorescence as a tool to identify drought stress in *Acer*  
391 genotypes. *Environ Exp Bot.* 2018;155:118-27.  
392 <https://doi.org/10.1016/j.envexpbot.2018.06.022>
- 393 11. Falqueto AR, da Silva Júnior RA, Gomes MTG, Martins JPR, Silva DM, Partelli FL.  
394 Effects of drought stress on chlorophyll *a* fluorescence in two rubber tree clones. *Sci*  
395 *Hortic.* 2017;224:238-43. <https://doi.org/10.1016/j.scienta.2017.06.019>
- 396 12. Rapacz M, Wójcik-Jagła M, Fiust A, Kalaji HM, Kościelniak J. Genome-wide  
397 associations of chlorophyll fluorescence OJIP transient parameters connected with soil  
398 drought response in barley. *Front Plant Sci.* 2019;10:78. Available from:



- 399 <https://doi.org/10.3389/fpls.2019.00078>
- 400 13. Navarrete AA, Tsai SM, Mendes LW, Faust K, De Hollander M, Cassman NA, et al.  
401 Soil microbiome responses to the short-term effects of Amazonian deforestation. *Mol*  
402 *Ecol.* 2015;24(10):2433-48. <https://doi.org/10.1111/mec.13172>
- 403 14. Wu ZZ, Ying YQ, Zhang Y Bin, Bi YF, Wang AK, Du XH. Alleviation of drought  
404 stress in *Phyllostachys edulis* by N and P application. *Sci Rep.* 2018;8:228. Available  
405 from: <https://doi.org/10.1038/s41598-017-18609-y>
- 406 15. Tariq A, Pan K, Olatunji OA, Graciano C, Li Z, Sun F, et al. Phosphorous fertilization  
407 alleviates drought effects on *Alnus cremastogyne* by regulating its antioxidant and  
408 osmotic potential. *Sci Rep.* 2018;8:5644. Available from:  
409 <https://doi.org/10.1038/s41598-018-24038-2>
- 410 16. Song Y, Li J, Liu M, Meng Z, Liu K, Sui N. Nitrogen increases drought tolerance in  
411 maize seedlings. *Funct Plant Biol.* 2019;46(4):350-9. <https://doi.org/10.1071/FP18186>
- 412 17. Jaquetti RK, Gonçalves JFC, Ferraz JBS, Ferreira MJ, dos Santos Junior UM.  
413 Ecofunctional traits and biomass production in leguminous tree species under  
414 fertilization treatments during forest restoration in Amazonia. *Forests.* 2016;7(4):76.  
415 Available from: <https://doi.org/10.3390/f7040076>
- 416 18. Jaquetti RK, Gonçalves JFC. Carbon and nutrient stocks of three Fabaceae trees used for  
417 forest restoration and subjected to fertilization in Amazonia. *An Acad Bras Cienc.*  
418 2017;89:3. Available from: <https://doi.org/10.1590/0001-3765201720160734>
- 419 19. Souza ML, Duarte AA, Lovato MB, Fagundes M, Valladares F, Lemos-Filho JP.  
420 Climatic factors shaping intraspecific leaf trait variation of a neotropical tree along a  
421 rainfall gradient. *PLoS One.* 2018;13(12):e0208512. Available from:  
422 <https://doi.org/10.1371/journal.pone.0208512>
- 423 20. Molina-Montenegro MA, Salgado-Luarte C, Osés R, Torres-Díaz C. Is physiological  
424 performance a good predictor for fitness? Insights from an invasive plant species. *PLoS*  
425 *One.* 2013;8(10). Available from: <https://doi.org/10.1371/journal.pone.0076432>
- 426 21. Funk JL, Larson JE, Ames GM, Butterfield BJ, Cavender-Bares J, Firm J, et al.

- 427 Revisiting the Holy Grail: Using plant functional traits to understand ecological  
428 processes. *Biol Rev.* 2017;92(2):1156-73. <https://doi.org/10.1111/brv.12275>
- 429 22. Banks JM. Continuous excitation chlorophyll fluorescence parameters: A review for  
430 practitioners. *Tree Physiol.* 2017;37(8):1128–36. <https://doi.org/10.1093/treephys/tpx059>
- 431 23. Kalaji HM, Schansker G, Brestic M, Bussotti F, Calatayud A, Ferroni L, et al.  
432 Frequently asked questions about chlorophyll fluorescence, the sequel. *Photosynth.Res.*  
433 2017;132:13-66. Available from: <https://doi.org/10.1007/s11120-016-0318-y>
- 434 24. Singh JS, Pandey VC, Singh DP. Efficient soil microorganisms: A new dimension for  
435 sustainable agriculture and environmental development. *Agric Ecosyst Environ.*  
436 2011;140:339-53. <https://doi.org/10.1016/j.agee.2011.01.017>
- 437 25. Jaquetti RK. Ecophysiology of Fabaceae tree species during forest restoration in the  
438 Balbina Hydroelectric Dam in Amazonas State. PhD. Thesis. National Institute for  
439 Amazonian Research. Available from: <https://bdtd.inpa.gov.br/handle/tede/2622>
- 440 26. dos Santos Junior UM, Gonçalves JFC, Feldpausch TR. Growth, leaf nutrient  
441 concentration and photosynthetic nutrient use efficiency in tropical tree species planted  
442 in degraded areas in central Amazonia. *For Ecol Manage.* 2006;226:299-309.  
443 <https://doi.org/10.1016/j.foreco.2006.01.042>
- 444 27. Gonçalves JFC, dos Santos Junior UM, Nina AR, Chevreuil LR. Energetic flux and  
445 performance index in copaiba (*Copaifera multijuga* Hayne) and mahogany (*Swietenia*  
446 *macrophylla* King) seedlings grown under two irradiance environments. *Braz J Plant*  
447 *Physiol.* 2007;19. Available from: <http://dx.doi.org/10.1590/S1677-04202007000300001>
- 448 28. Stirbet A, Lazár D, Kromdijk J, Govindjee. Chlorophyll a fluorescence induction: Can  
449 just a one-second measurement be used to quantify abiotic stress responses?  
450 *Photosynthetica.* 2018;56:86-104. <https://doi.org/10.1007/s11099-018-0770-3>
- 451 29. James FC, McCulloch CE. Multivariate analysis in ecology and systematics: Panacea or  
452 Pandora's Box? *Annu Rev Ecol Evol Syst.* 1990;21:129-66.  
453 <https://doi.org/10.1146/annurev.es.21.110190.001021>
- 454 30. Noy-Meir I, Walker D, Williams WT. Data transformations in ecological ordination: II.

- 455 On the meaning of data standardization. *J Ecol.* 1975;63(3):779-800.  
456 <https://www.jstor.org/stable/2258601>
- 457 31. Porcar-Castell A, Tyystjärvi E, Atherton J, Van Der Tol C, Flexas J, Pfündel EE, et al.  
458 Linking chlorophyll *a* fluorescence to photosynthesis for remote sensing applications:  
459 Mechanisms and challenges. *J Exp Bot.* 2014;65(15):4065-95.  
460 <https://doi.org/10.1093/jxb/eru191>
- 461 32. Kalaji HM, Jajoo A, Oukarroum A, Brestic M, Zivcak M, Samborska IA, et al.  
462 Chlorophyll *a* fluorescence as a tool to monitor physiological status of plants under  
463 abiotic stress conditions. *Acta Physiol Plant.* 2016;38:102. Available from:  
464 <https://link.springer.com/article/10.1007/s11738-016-2113-y>
- 465 33. Nina Junior AR, Maia JMF, Martins SCV, Gonçalves JFC. Photochemical efficiency  
466 and oxidative metabolism of tree species during acclimation to high and low irradiance.  
467 *Plants.* 2020;9(8):1047. Available from: <https://doi.org/10.3390/plants9081047>
- 468 34. Favaretto VF, Martinez CA, Soriani HH, Furriel RPM. Differential responses of  
469 antioxidant enzymes in pioneer and late-successional tropical tree species grown under  
470 sun and shade conditions. *Environ Exp Bot.* 2011;70(1):20-8.  
471 <https://doi.org/10.1016/j.envexpbot.2010.06.003>
- 472 35. Tyystjärvi E. Photoinhibition of Photosystem II\*. In: Jeon KW, editor. International  
473 review of cell and molecular biology. Elsevier Inc.; 2013. pp. 243-303.
- 474 36. Zivcak M, Brestic M, Kalaji HM, Govindjee. Photosynthetic responses of sun- and  
475 shade-grown barley leaves to high light: Is the lower PSII connectivity in shade leaves  
476 associated with protection against excess of light? *Photosynth Res.* 2014;119(3):339-54.  
477 Available from: <https://doi.org/10.1007/s11120-014-9969-8>
- 478 37. Jiménez-Muñoz JC, Mattar C, Barichivich J, Santamaría-Artigas A, Takahashi K, Malhi  
479 Y, et al. Record-breaking warming and extreme drought in the Amazon rainforest during  
480 the course of El Niño 2015-2016. *Sci Rep.* 2016;6:33130. Available from:  
481 <https://doi.org/10.1038/srep33130>
- 482 38. Chaves MM, Flexas J, Pinheiro C. Photosynthesis under drought and salt stress:

- 483 Regulation mechanisms from whole plant to cell. *Ann Bot.* 2009;103(4):551-60.  
484 <https://doi.org/10.1093/aob/mcn125>
- 485 39. Zivcak M, Brestic M, Balatova Z, Drevenakova P, Olsovska K, Kalaji HM, et al.  
486 Photosynthetic electron transport and specific photoprotective responses in wheat leaves  
487 under drought stress. *Photosynth Res.* 2013;117:529-46. [https://doi.org/10.1007/s11120-](https://doi.org/10.1007/s11120-013-9885-3)  
488 [013-9885-3](https://doi.org/10.1007/s11120-013-9885-3)
- 489 40. Warren CR, Aranda I, Cano FJ. Responses to water stress of gas exchange and  
490 metabolites in *Eucalyptus* and *Acacia* spp. *Plant Cell Environ.* 2011;34(10):1609-29.  
491 Available from: <https://doi.org/10.1111/j.1365-3040.2011.02357.x>
- 492 41. Lassouane N, Aïd F, Lutts S. Water stress impact on young seedling growth of *Acacia*  
493 *arabica*. *Acta Physiol Plant.* 2013;35:2157-69. [https://doi.org/10.1007/s11738-013-](https://doi.org/10.1007/s11738-013-1252-7)  
494 [1252-7](https://doi.org/10.1007/s11738-013-1252-7)
- 495 42. Roosta HR, Estaji A, Niknam F. Effect of iron, zinc and manganese shortage-induced  
496 change on photosynthetic pigments, some osmoregulators and chlorophyll fluorescence  
497 parameters in lettuce. *Photosynthetica.* 2018;56:606-615.  
498 <https://doi.org/10.1007/s11099-017-0696-1>
- 499 43. Santiago LS. Nutrient limitation of eco-physiological processes in tropical trees. *Trees.*  
500 2015;29:1291-1300. <https://doi.org/10.1007/s00468-015-1260-x>
- 501 44. Andrejić G, Gajić G, Prica M, Dželetović, Rakić T. Zinc accumulation, photosynthetic  
502 gas exchange, and chlorophyll a fluorescence in Zn-stressed *Miscanthus × giganteus*  
503 plants. *Photosynthetica.* 2018;56(4):1249-58. <https://doi.org/10.1007/s11099-018-0827-3>
- 504 45. Liao T, Wang Y, Xu CP, Li Y, Kang XY. Adaptive photosynthetic and physiological  
505 responses to drought and rewatering in triploid *Populus* populations. *Photosynthetica.*  
506 2018;56:578-590. <https://doi.org/10.1007/s11099-017-0704-5>
- 507 46. da Costa KCP, Jaquetti RK, Gonçalves JFC. Chlorophyll *a* fluorescence of *Bertholletia*  
508 *excelsa* Bonpl. plantations under thinning, liming, and phosphorus fertilization.  
509 *Photosynthetica.* 2020;58:323-30. Forthcoming
- 510 47. Yan BF, Duan W, Liu GT, Xu HG, Wang LJ, Li SH. Response of bean (*Vicia faba* L.)

- 511 plants to low sink demand by measuring the gas exchange rates and chlorophyll a  
512 fluorescence kinetics. PLoS One. 2013;8(12):e80770. Available from:  
513 <https://doi.org/10.1371/journal.pone.0080770>
- 514 48. Wang X, Wang L, Shangguan Z. Leaf gas exchange and fluorescence of two winter  
515 wheat varieties in response to drought stress and nitrogen supply. PLoS One. 2016;  
516 11(11):e0165733. Available from: <https://doi.org/10.1371/journal.pone.0165733>
- 517 49. Shimpl FC, Ferreira MJ, Jaquetti RK, Martins SCV, Gonçalves JFC. Physiological  
518 responses of young Brazil nut (*Bertholletia excelsa*) plants to drought stress and  
519 subsequent rewatering. Flora. 2019;252:10–7.  
520 <https://doi.org/10.1016/j.flora.2019.02.001>
- 521 50. Swoczyna T, Kalaji HM, Pietkiewicz S, Borowski J. Ability of various tree species to  
522 acclimation in urban environments probed with the JIP-test. Urban For Urban Green.  
523 2015;14(3):544-53. <https://doi.org/10.1016/j.ufug.2015.05.005>
- 524 51. Robakowski P, Pers-Kamczyc E, Ratajczak E, Thomas PA, Ye ZP, Rabska M, et al.  
525 Photochemistry and antioxidative capacity of female and male *Taxus baccata* L.  
526 acclimated to different nutritional environments. Front Plant Sci. 2018;9:742.  
527 <https://doi.org/10.3389/fpls.2018.00742>
- 528 52. Salazar JCS, Melgarejo LM, Casanoves F, Di Rienzo JA, DaMatta FM, Armas C.  
529 Photosynthesis limitations in cacao leaves under different agroforestry systems in the  
530 Colombian Amazon. PLoS One. 2018;13(11):e0206149. Available from:  
531 <https://doi.org/10.1371/journal.pone.0206149>
- 532 53. Mathur S, Jain L, Jajoo A. Photosynthetic efficiency in sun and shade plants.  
533 Photosynthetica. 2018;56:354-65. <https://doi.org/10.1007/s11099-018-0767-y>
- 534 54. Meng L-L, Song J-F, Wen J, Zhang J, Wei J-H. Effects of drought stress on fluorescence  
535 characteristics of photosystem II in leaves of *Plectranthus scutellarioides*.  
536 Photosynthetica 2016;54:414-421. <https://doi.org/10.1007/s11099-016-0191-0>
- 537 55. Guo Y, Tan J. Recent advances in the application of chlorophyll a fluorescence from  
538 photosystem II. Photochem Photobiol. 2015;91(1):1-14. Available from:

- 539 <https://doi.org/10.1111/php.12362>
- 540 56. Abid M, Tian Z, Ata-Ul-Karim ST, Cui Y, Liu Y, Zahoor R, et al. Nitrogen nutrition  
541 improves the potential of wheat (*Triticum aestivum* L.) to alleviate the effects of drought  
542 stress during vegetative growth periods. *Front Plant Sci.* 2016;7:981. Available from:  
543 <https://doi.org/10.3389/fpls.2016.00981>
- 544 57. Kebbas S, Lutts S, Aid F. Effect of drought stress on the photosynthesis of *Acacia*  
545 *tortilis* subsp. *raddiana* at the young seedling stage. *Photosynthetica* 2015;53:288-298.  
546 <https://doi.org/10.1007/s11099-015-0113-6>
- 547 58. Carstensen A, Szameitat AE, Frydenvang J, Husted S. Chlorophyll *a* fluorescence  
548 analysis can detect phosphorus deficiency under field conditions and is an effective tool  
549 to prevent grain yield reductions in spring barley (*Hordeum vulgare* L.). *Plant Soil.*  
550 2019;434:79–91. <https://doi.org/10.1007/s11104-018-3783-6>
- 551 59. Lee TY, Woo SY, Kwak MJ, Inkyin K, Lee KE, Jang JH, et al. Photosynthesis and  
552 chlorophyll fluorescence responses of *Populus sibirica* to water deficit in a  
553 desertification area in Mongolia. *Photosynthetica.* 2016;54(2):317-20.  
554 <https://doi.org/10.1007/s11099-015-0180-8>
- 555 60. Dias DP, Marengo RA. Photoinhibition of photosynthesis in *Minuartia guianensis* and  
556 *Swietenia macrophylla* inferred by monitoring the initial fluorescence. *Photosynthetica.*  
557 2006;44:235-240. <https://doi.org/10.1007/s11099-006-0013-x>
- 558
- 559

## 560 **Supporting information**

561 **S1 Fig. PCA ordination and loadings graphic for the seasonal effects in the low-nutrient**  
562 **treatment.**  $PI_{ABS}$ , performance index on an absorption basis;  $ET_0/TR_0$ , efficiency of electron  
563 transport;  $DI_0/RC$ , energy dissipation flux;  $ABS/RC$ , antenna size of an active PSII reaction  
564 center;  $F_M$ , maximum fluorescence;  $F_V$ , maximum variable fluorescence.

565

566 **S2 Fig. PCA ordination and loadings graphic for the fertilization effect in the dry season.**

567  $ET_0/TR_0$ , efficiency of electron transport;  $ET_0/RC$ , electron transport flux;  $DI_0/RC$ , energy

568 dissipation flux;  $ABS/RC$ , antenna size of an active PSII reaction center;  $F_M$ , maximum

569 fluorescence;  $F_V$ , maximum variable fluorescence.

570

571 **S3 Fig. The OJIP curve during the wet season under low (○) and high (□) nutrient**

572 **conditions.**

573

574 **S1 Table. Effects of seasonality and fertilization with 21 and 11 ChF variables.**

575

576 **S2 Table. Product-moment correlations obtained through principal component analysis**

577 **(PCA).**  $F_0$ , initial fluorescence;  $F_M$ , maximum fluorescence;  $F_V$ , maximum variable

578 fluorescence;  $F_V/F_M$ , maximum quantum yield of PSII photochemistry;  $PI_{ABS}$ , performance

579 index on an absorption basis;  $ET_0/TR_0$ , efficiency of electron transport;  $DI_0/RC$ , energy

580 dissipation flux;  $ABS/RC$ , antenna size of an active PSII reaction center;  $ET_0/RC$ , electron

581 transport flux;  $TR_0/RC$ , maximum trapped exciton flux;  $RC/CS$ , density of reaction centers per

582 cross-section.

583 **S3 Table. Mean ChF variables values for the six studied species under the different water**

584 **and nutrient regimes.**  $F_0$ , initial fluorescence;  $F_M$ , maximum fluorescence;  $F_V$ , maximum

585 variable fluorescence;  $F_V/F_M$ , maximum quantum yield of PSII photochemistry;  $PI_{ABS}$ ,

586 performance index on an absorption basis;  $ET_0/TR_0$ , efficiency of electron transport;  $DI_0/RC$ ,

587 energy dissipation flux;  $ABS/RC$ , antenna size of an active PSII RC;  $ET_0/RC$ , electron transport

588 flux;  $TR_0/RC$ , maximum trapped exciton flux;  $RC/CS$ , density of reaction centers per cross-

589 section.

590

591 **S4 Table. Results of the ANOVA for the effects of seasonality, fertilization and species on**

592  **$PI_{ABS}$  and  $DI_0/RC$ .**  $PI_{ABS}$ , performance index on an absorption basis;  $DI_0/RC$ , energy dissipation

593 flux. Degrees of freedom for species = 5, and fertilization = 1. \* Significance at the 0.05 level;

594 \*\* Significance at the 0.01 level.



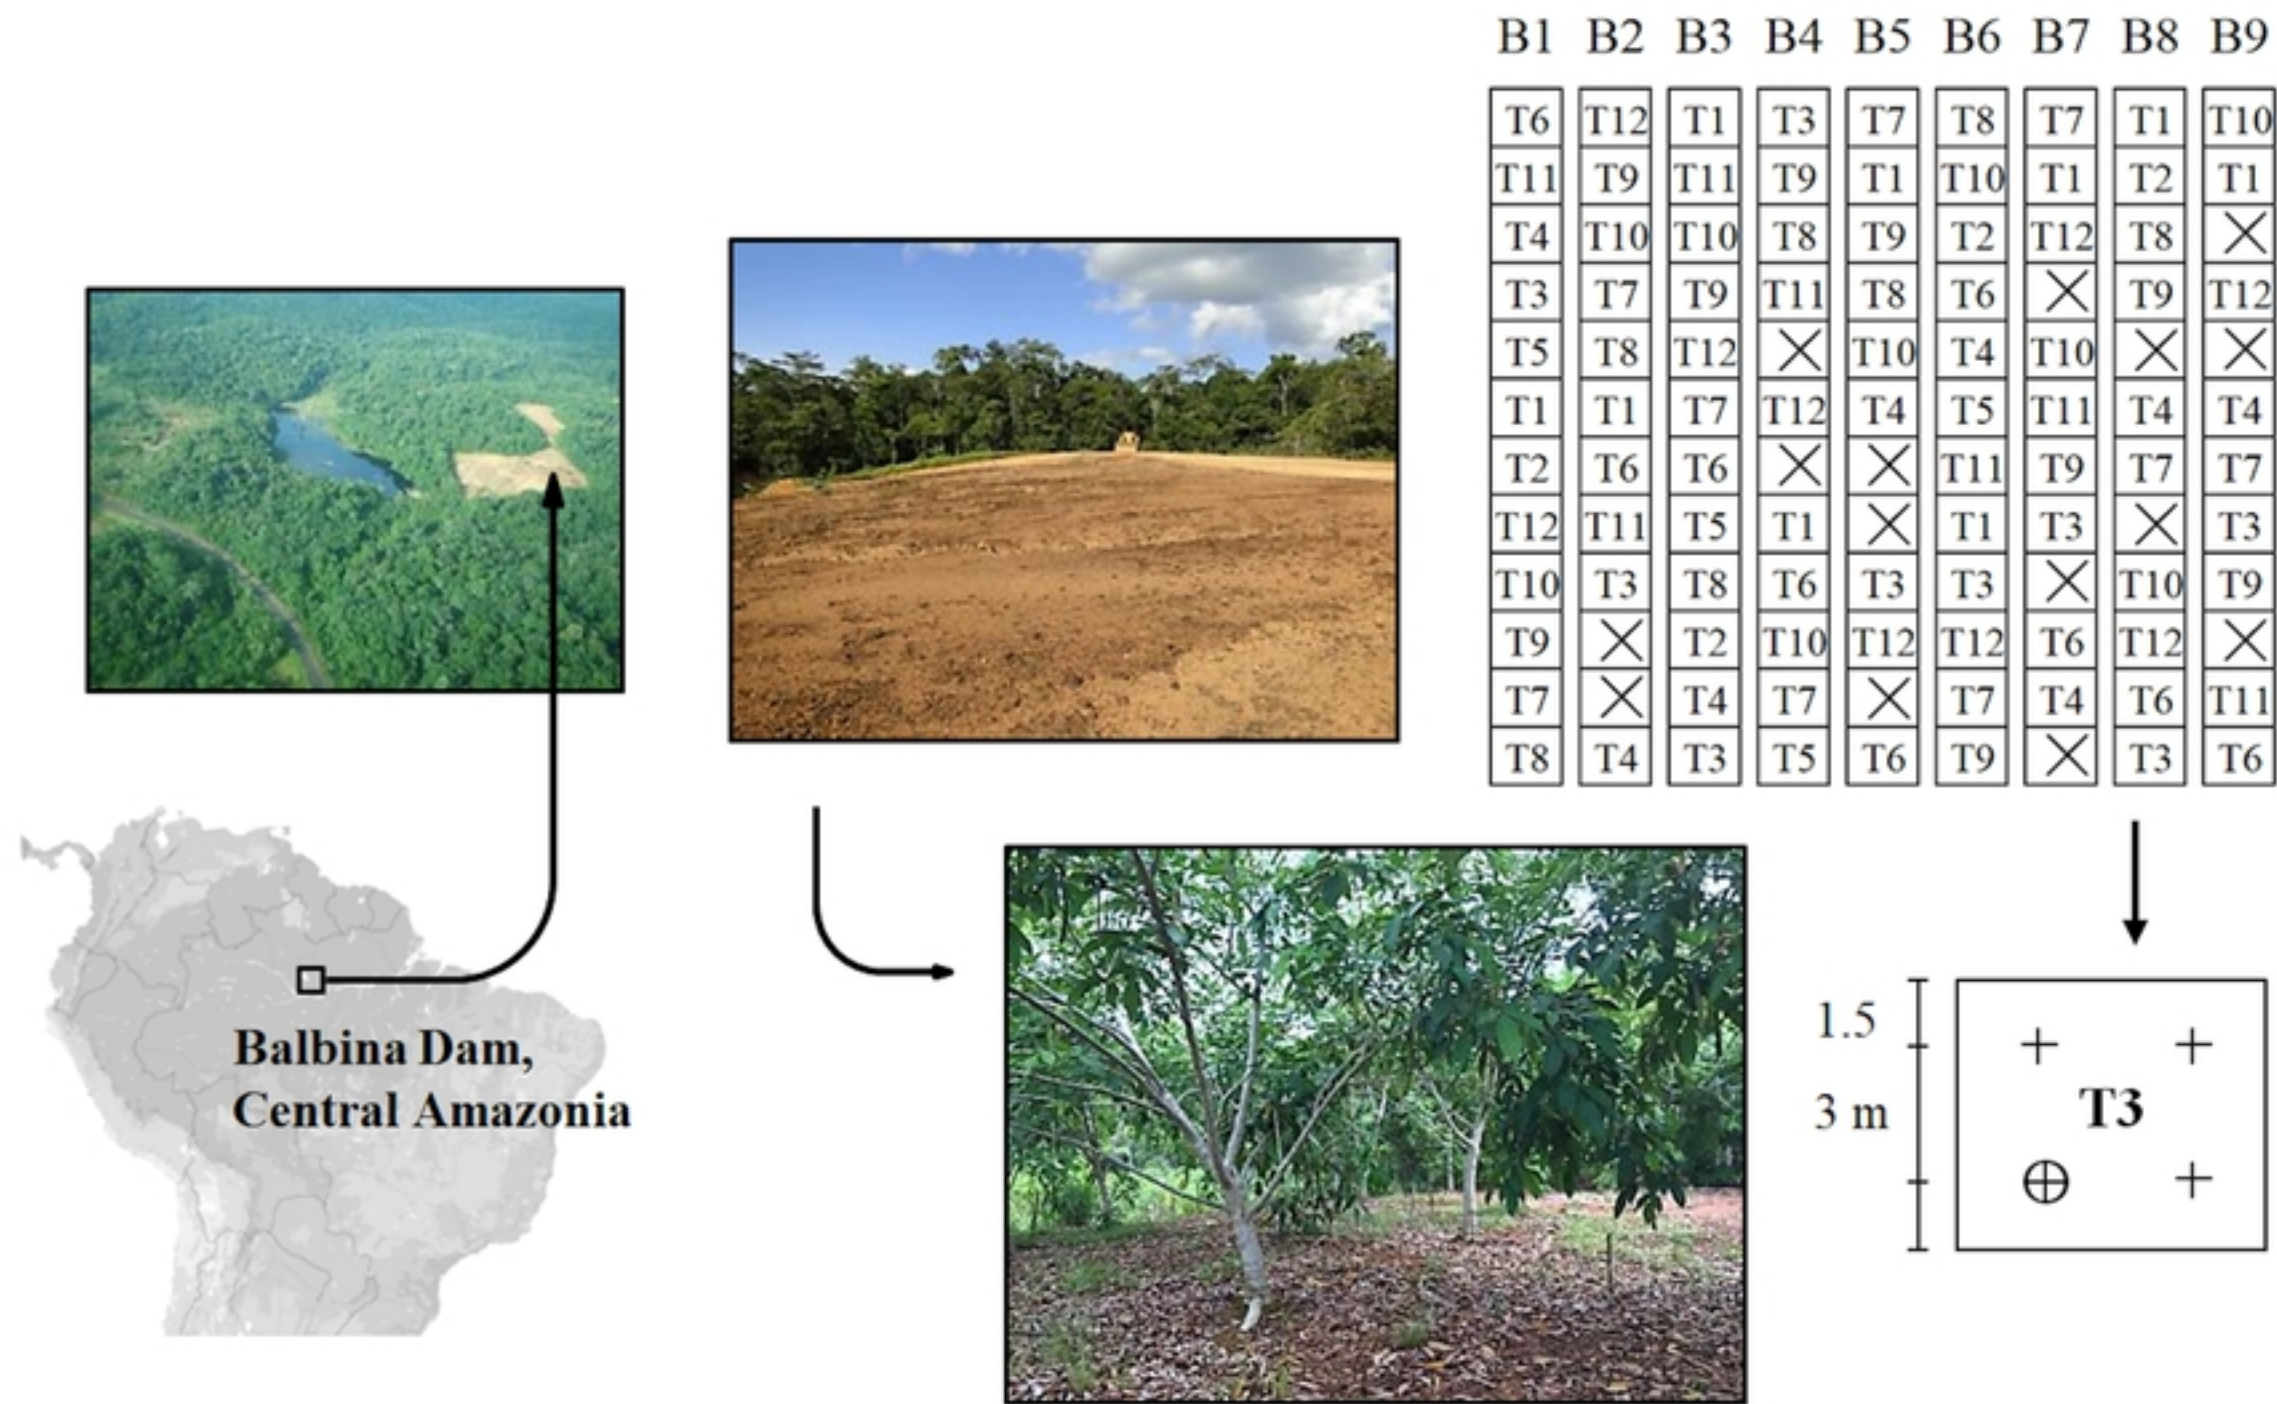

Figure 1

PCA Axis 2: (15.6%)

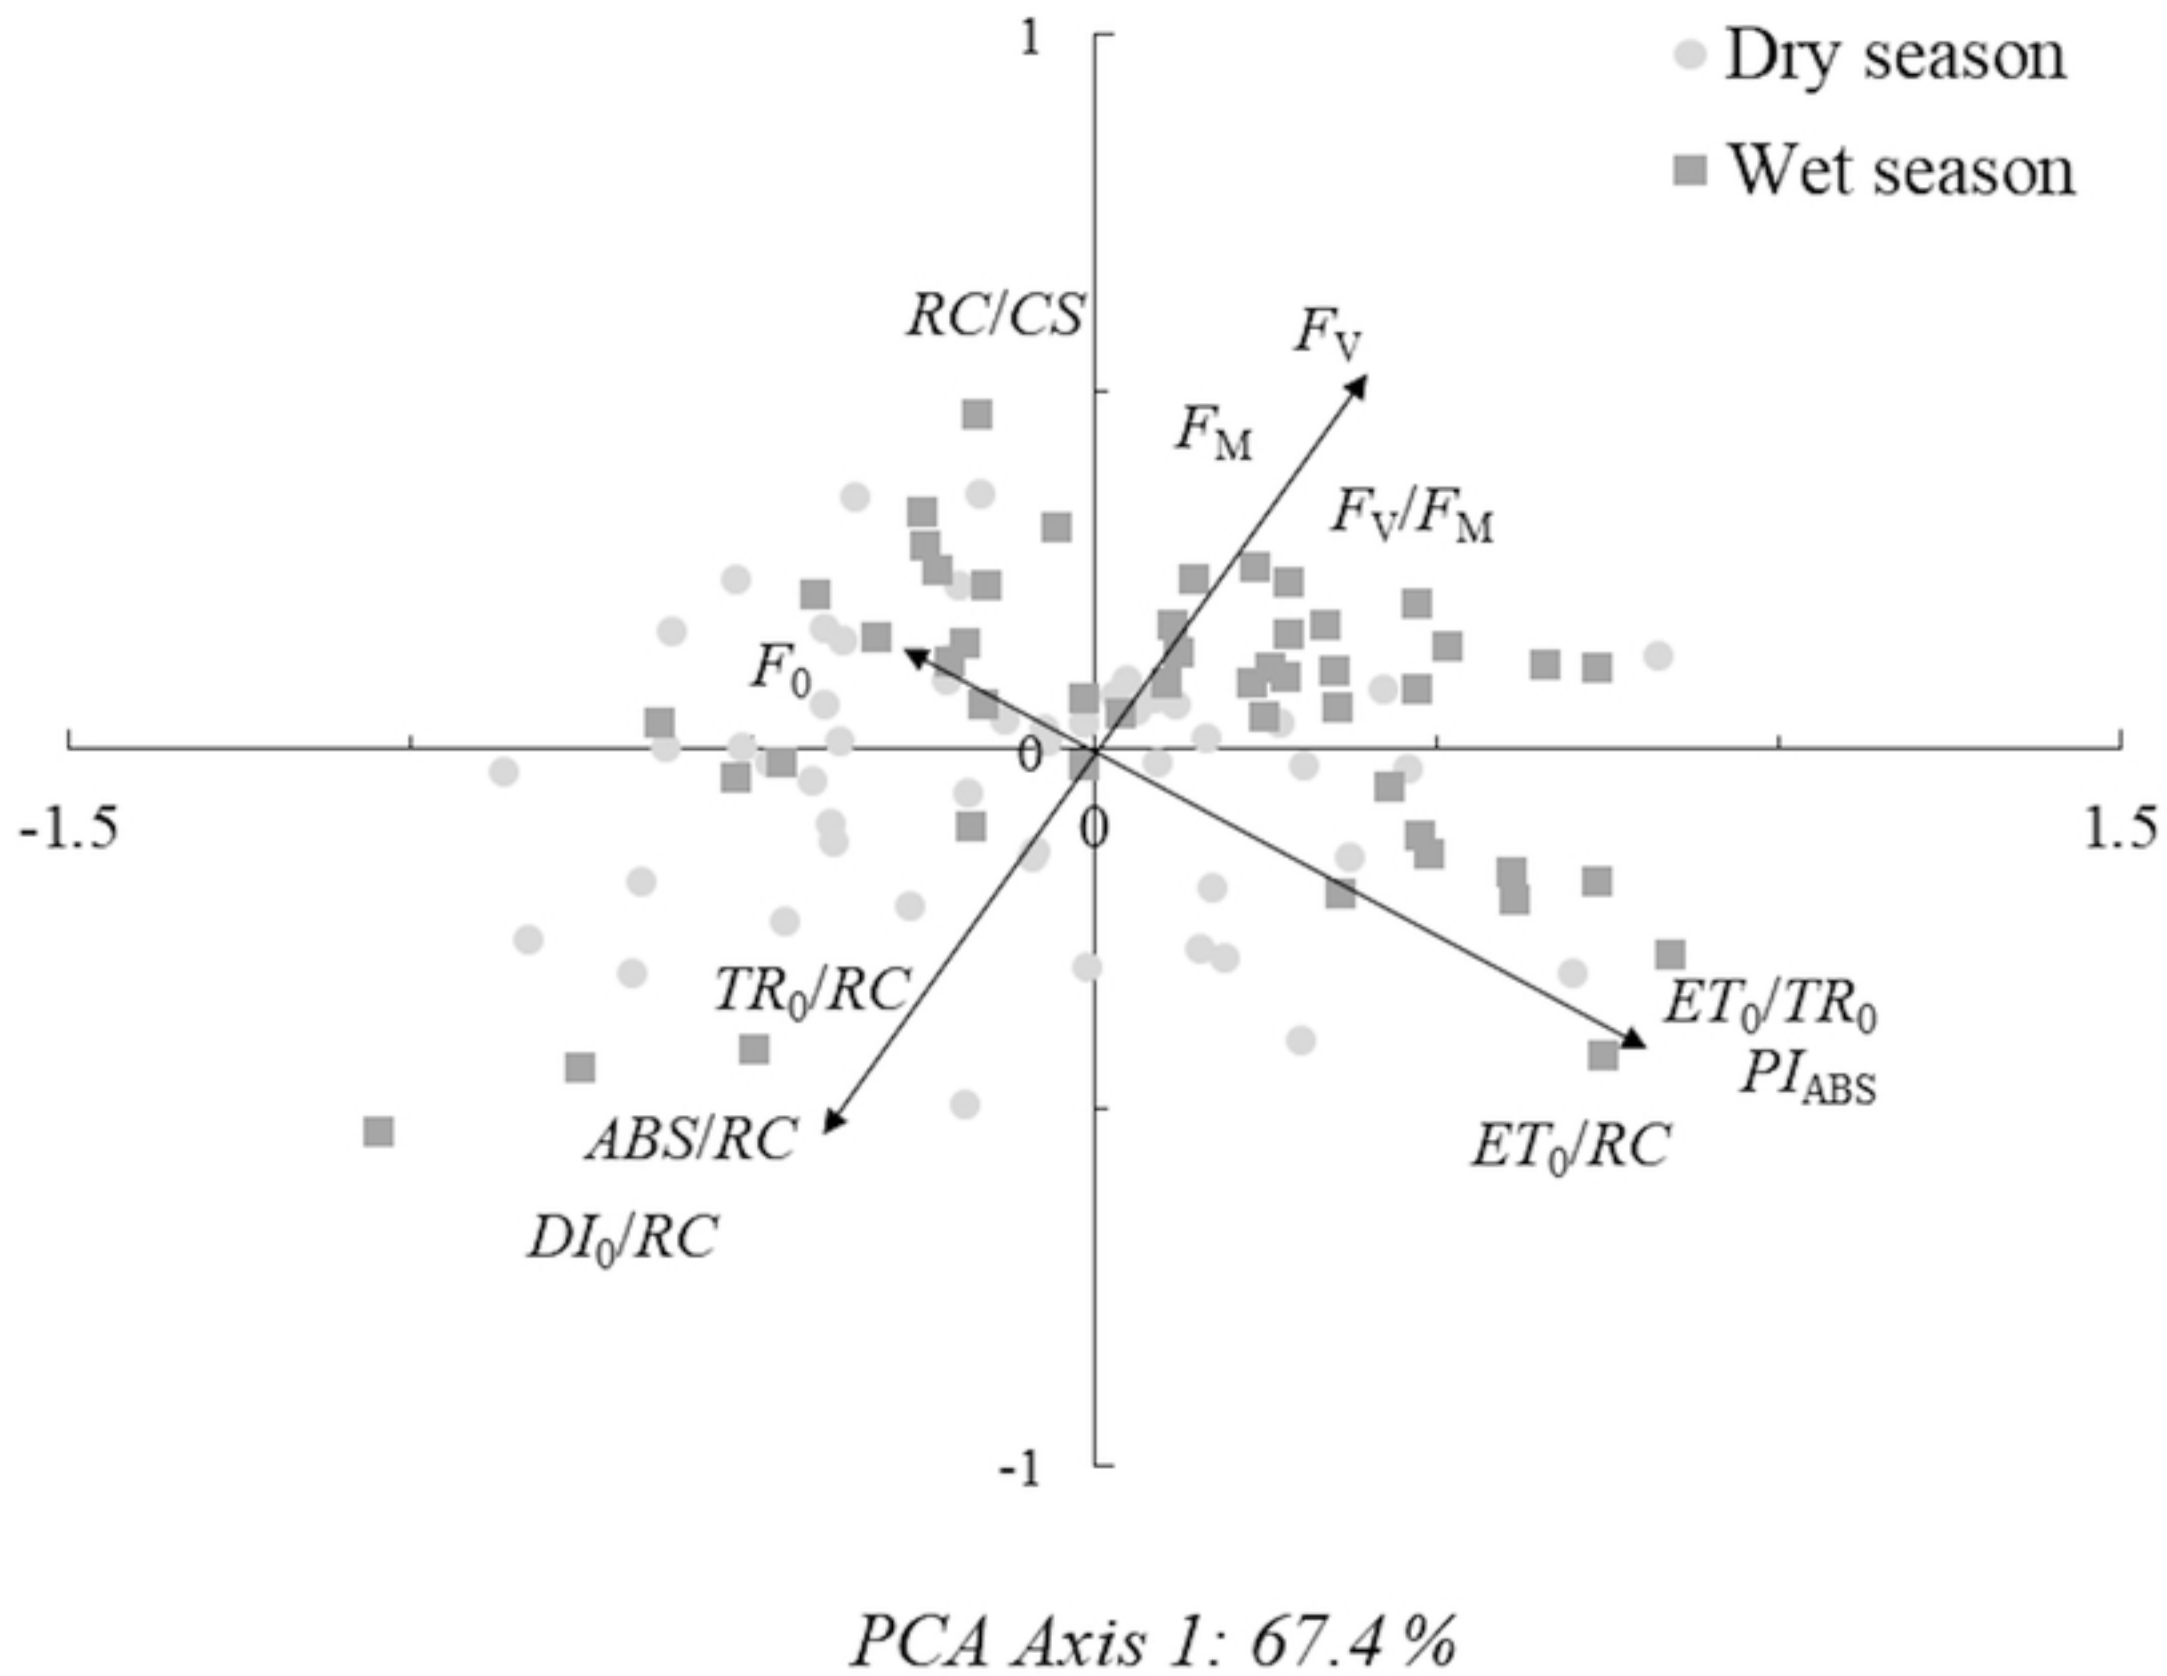

Figure 2

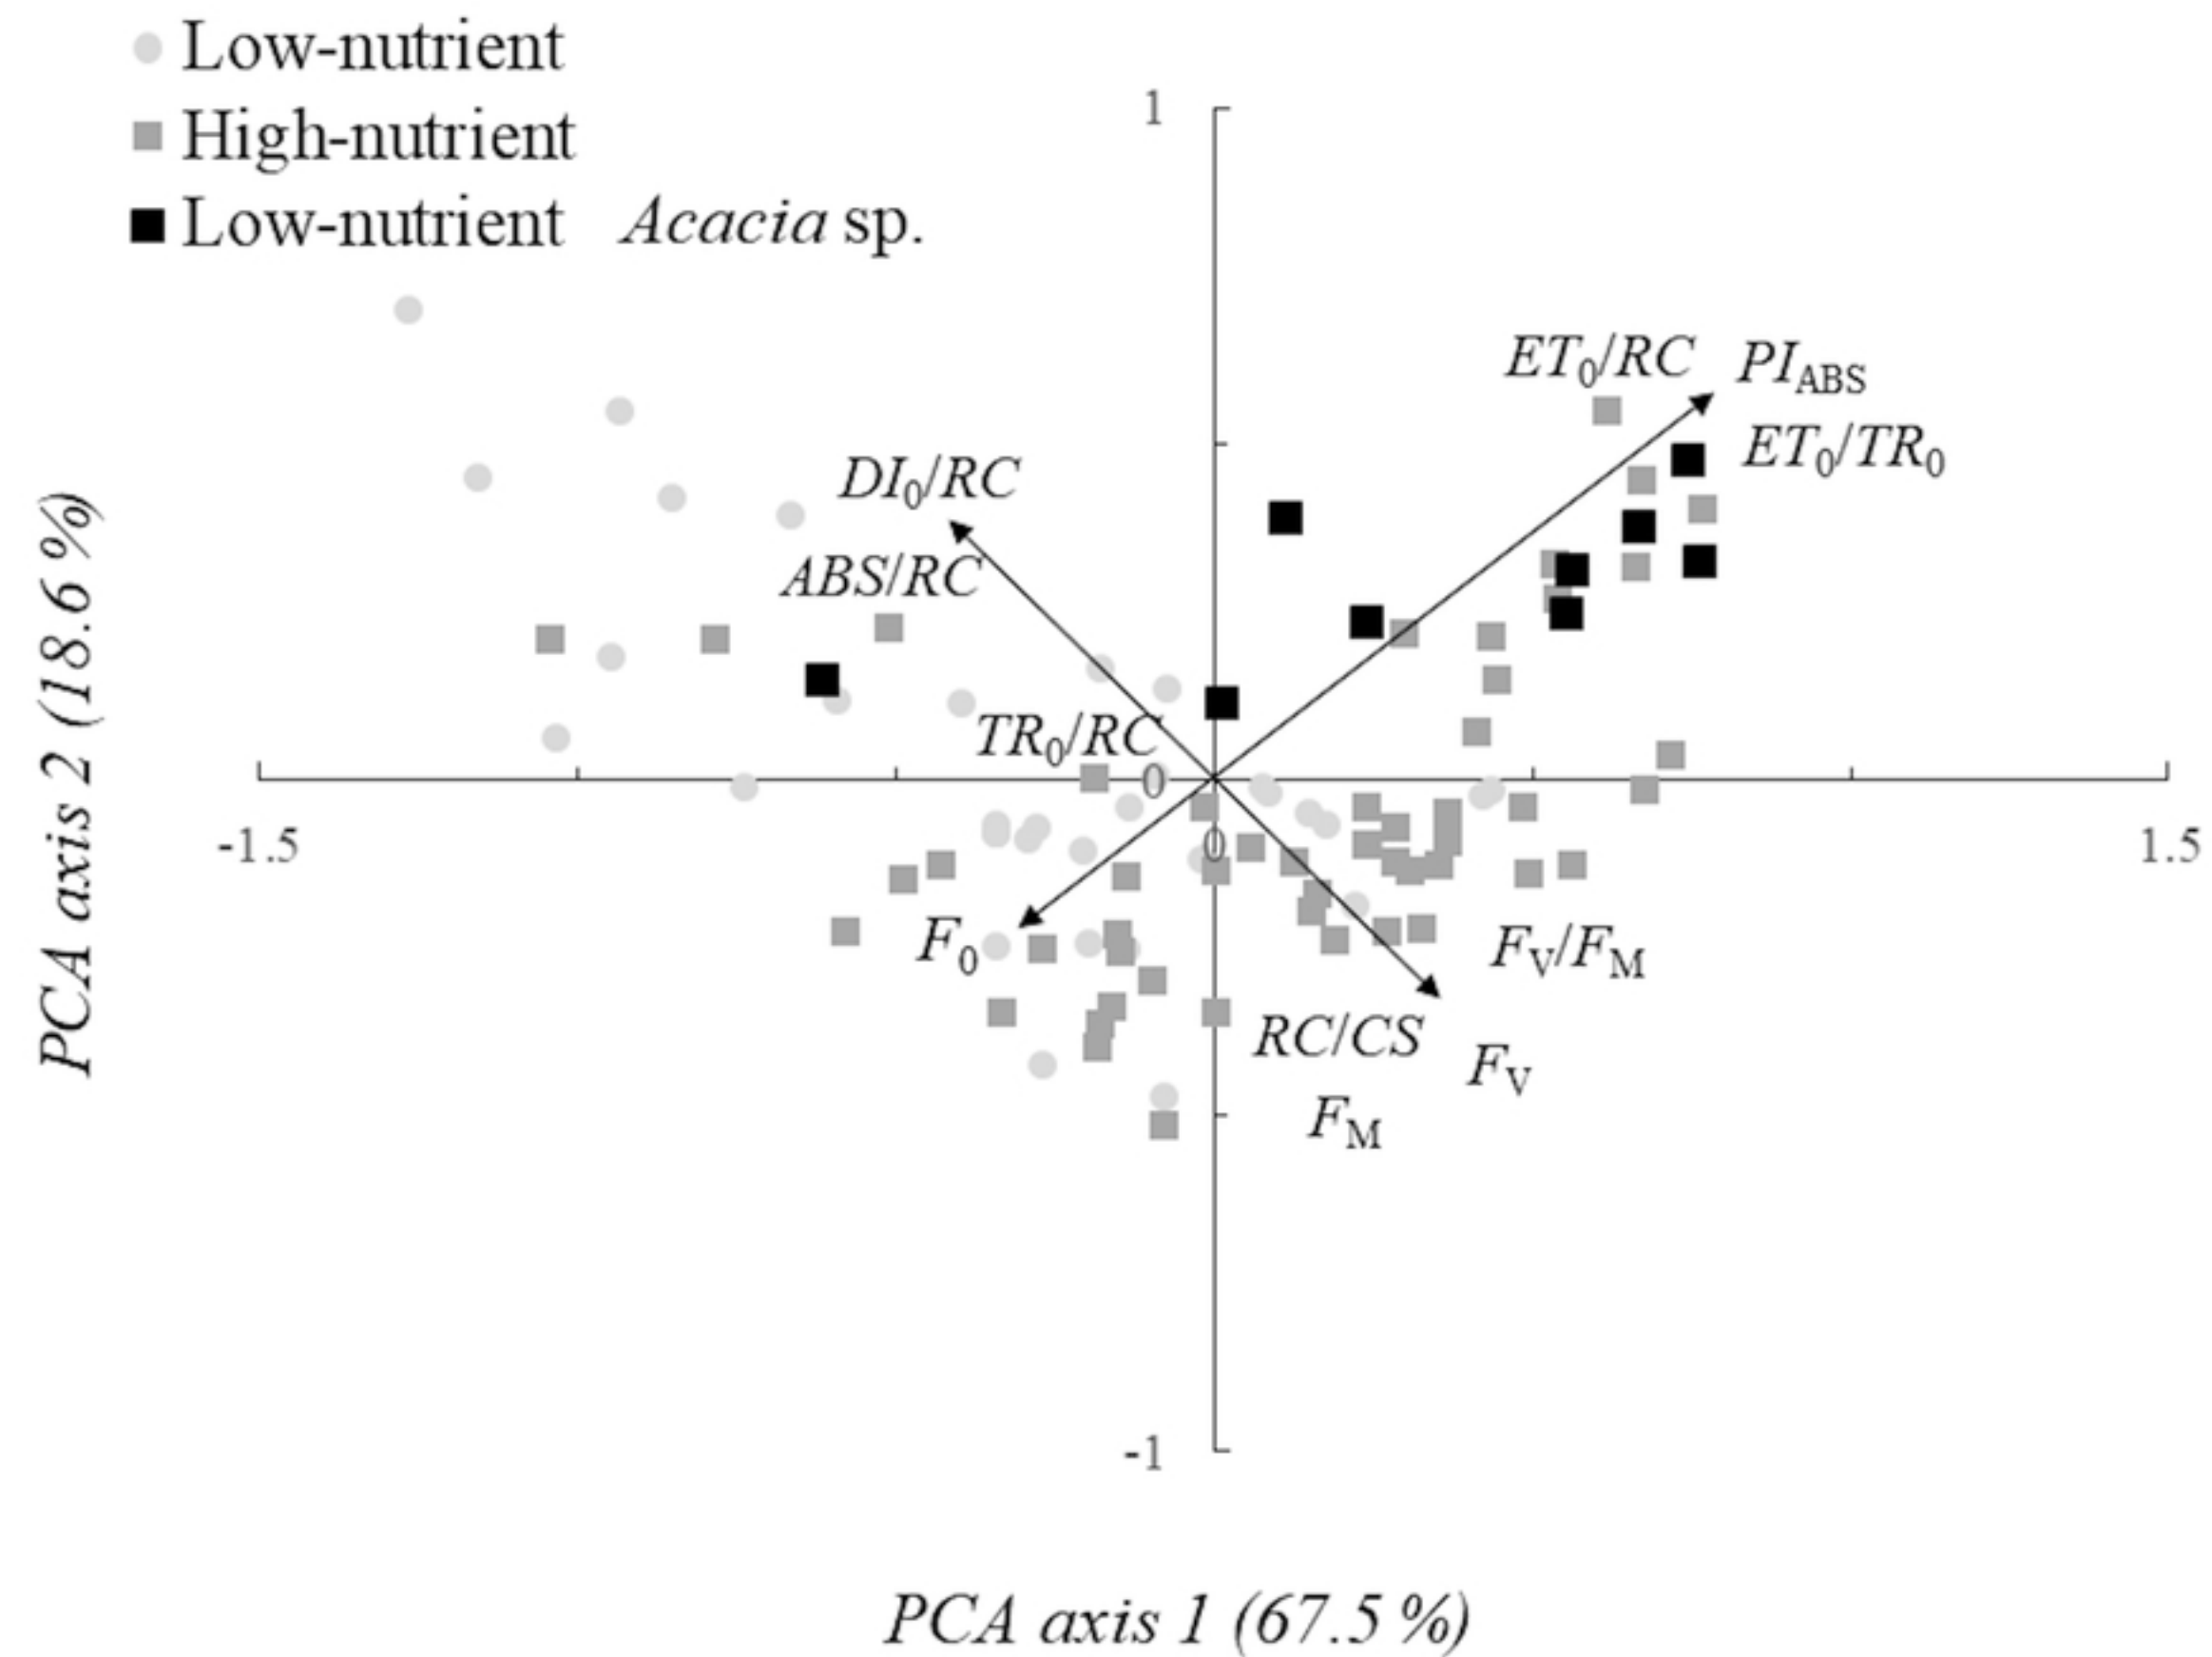

Figure 3

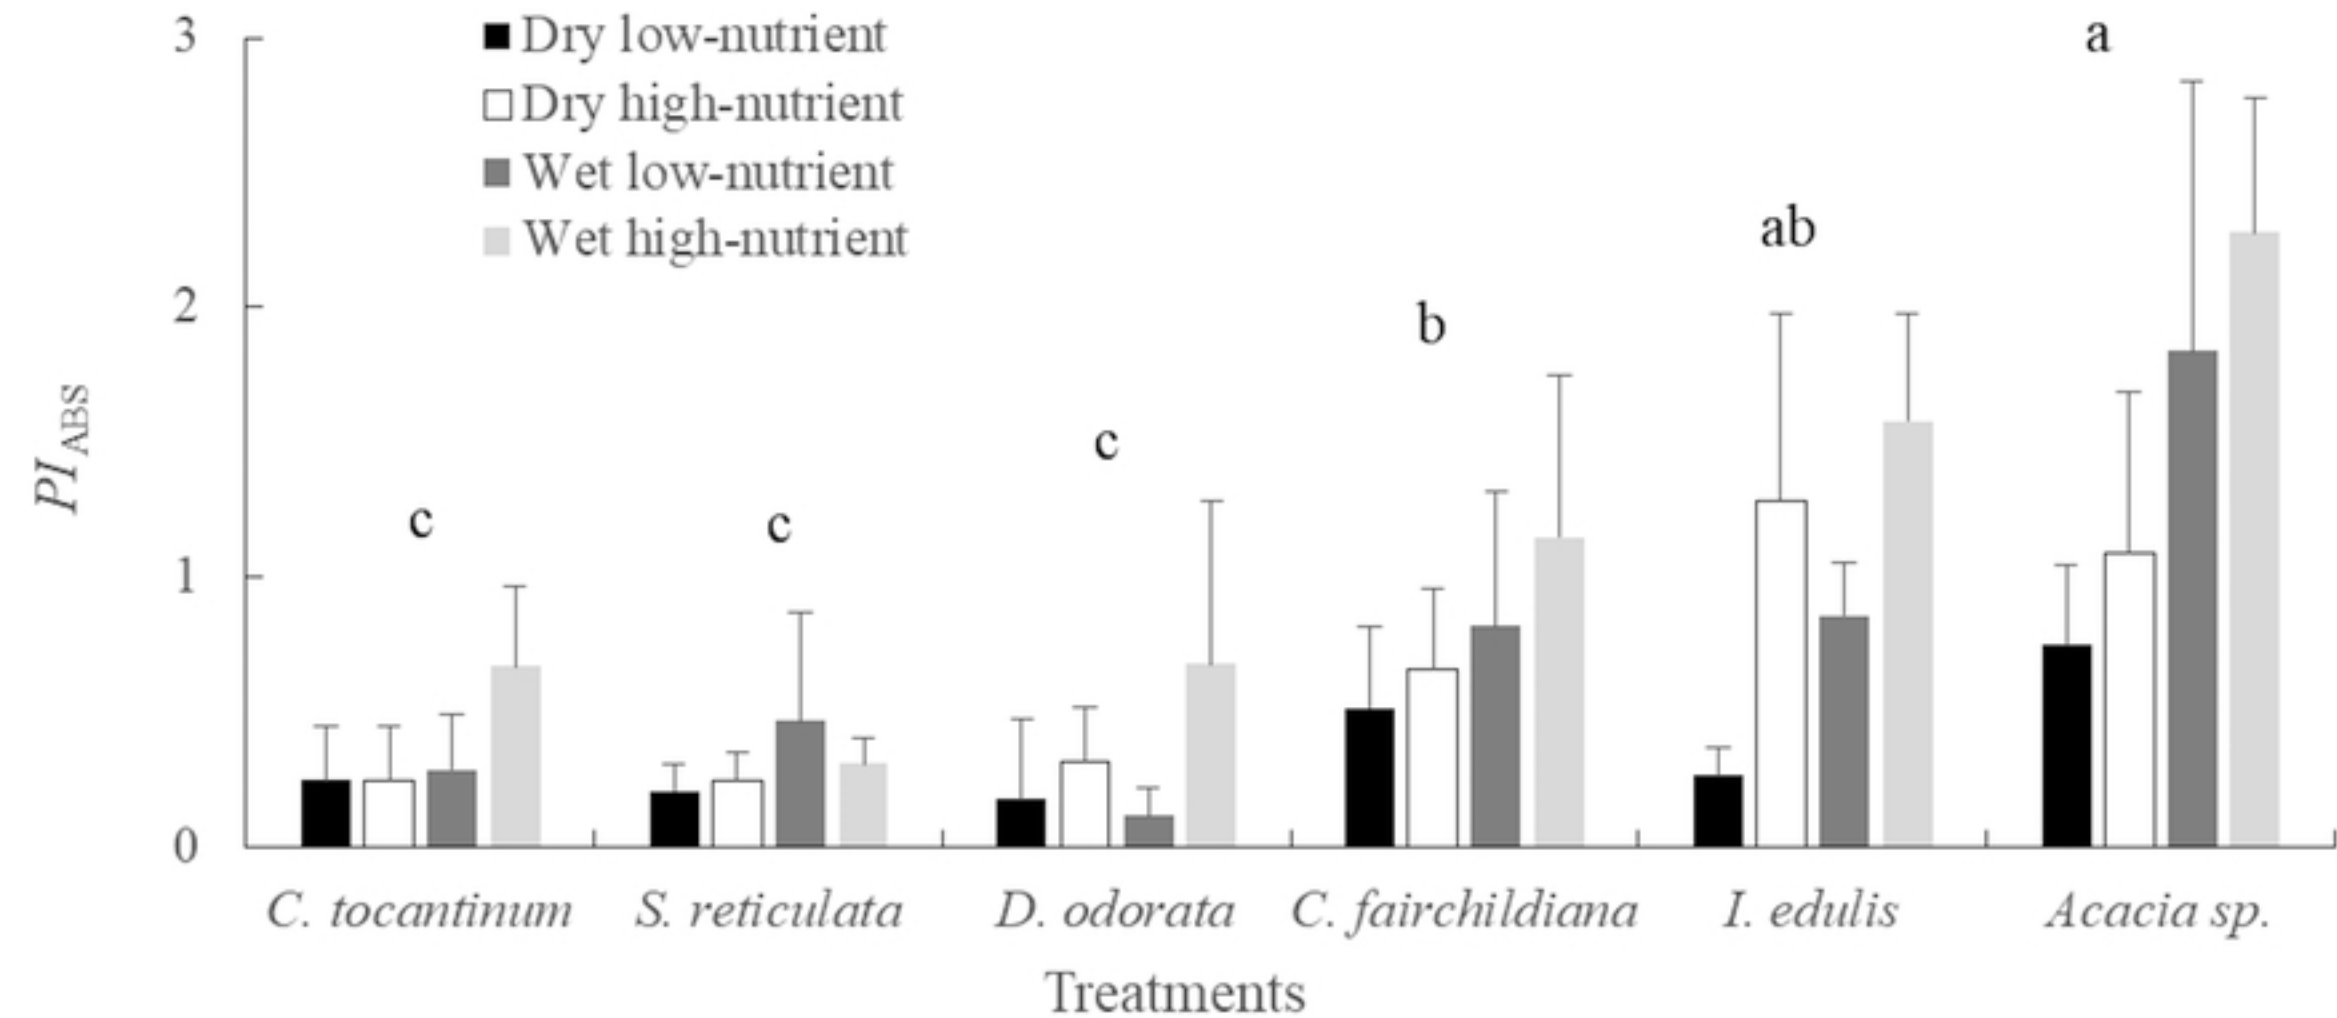

Figure 4

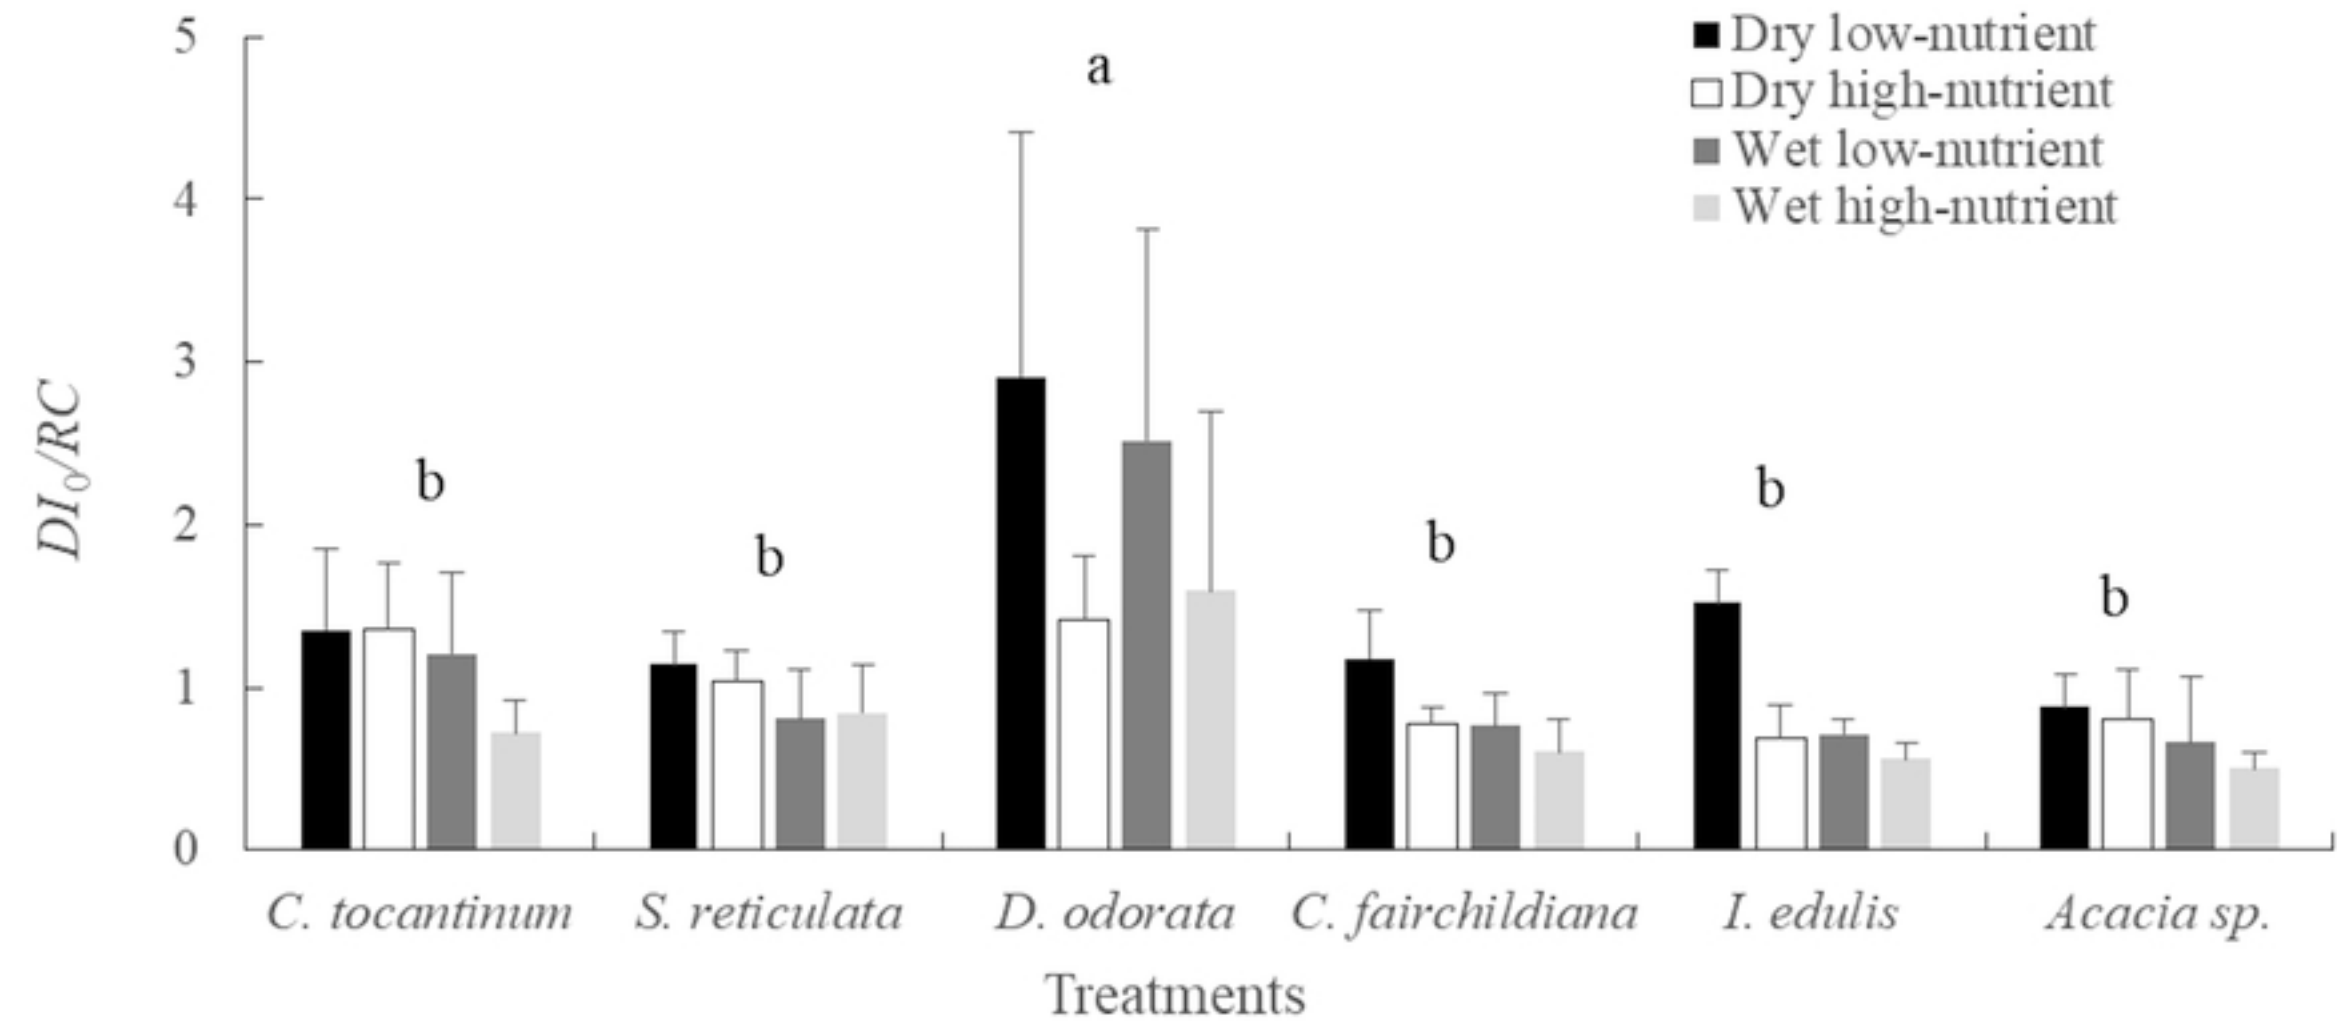

Figure 5

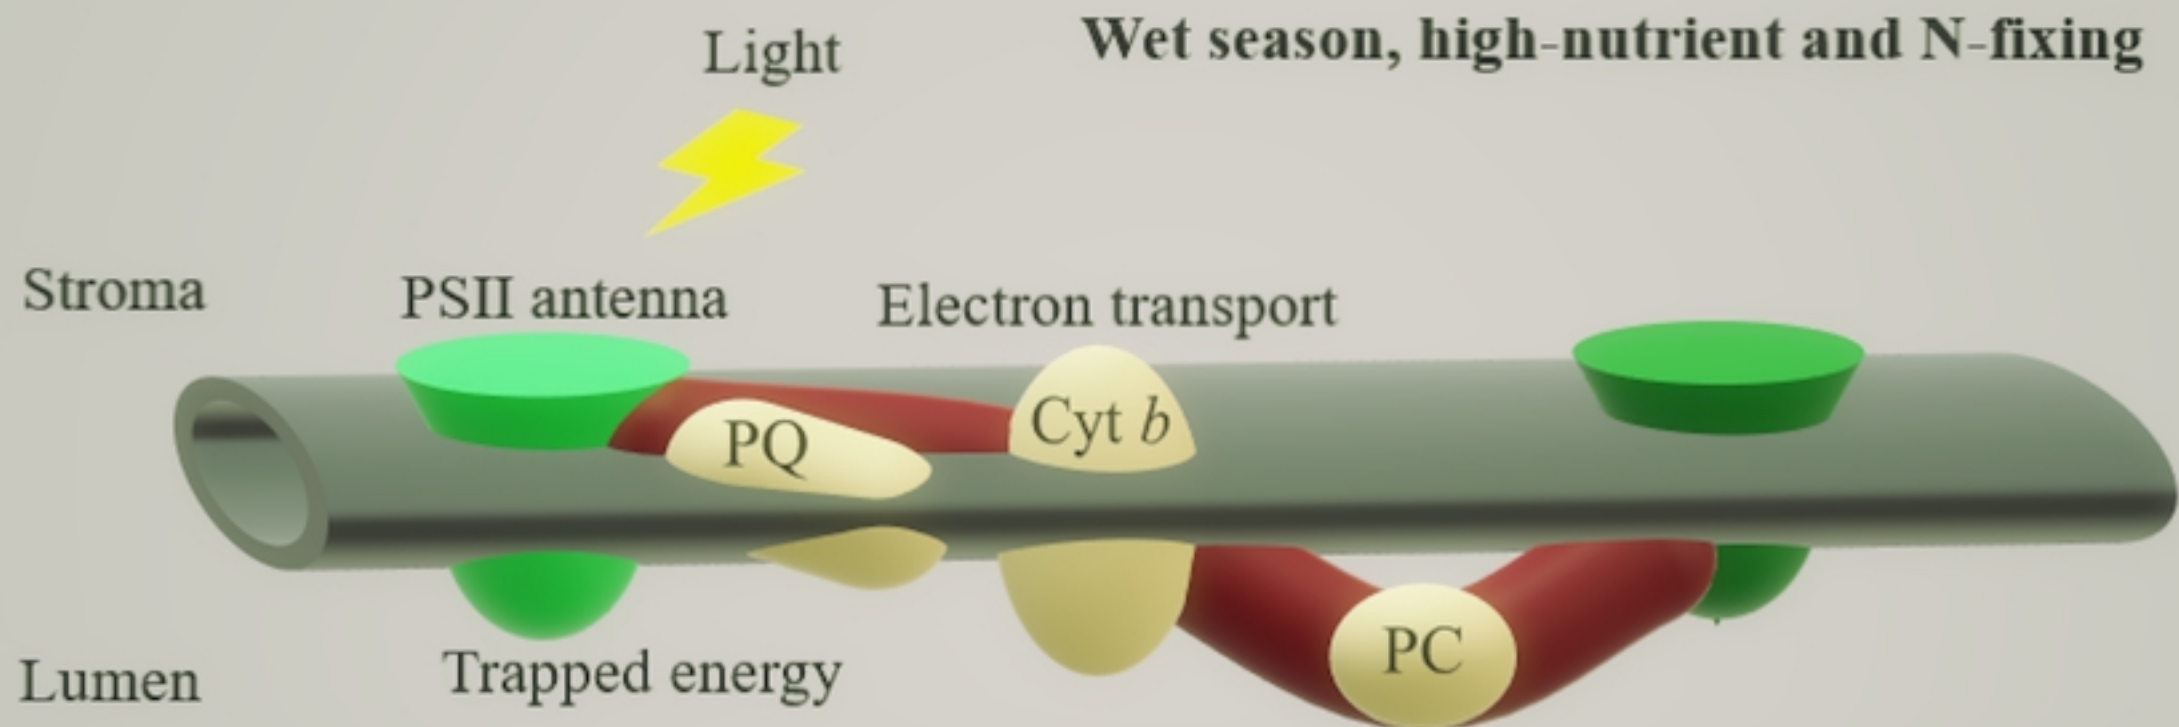

Energy dissipation

**Dry season and low-nutrient**

Figure 6
